# Supplementary material for: Identification of Plasmodium falciparum and host factors associated with cerebral malaria: description of the protocol for a prospective, case-control study in Benin (NeuroCM)
Source: PubMed Central journal article supplement — BMJ Open. 2019 May 28;9(5):e027378. doi: 10.1136/bmjopen-2018-027378 (PMC6549734; doi:10.1136/bmjopen-2018-027378), 2019-05-28
Supplement: bmjopen-2018-027378.draft_revisions.pdf [file bmjopen-2018-027378.draft_revisions.pdf]

# BMJ Open

BMJ Open is committed to open peer review. As part of this commitment we make the peer review history of every article we publish publicly available.

When an article is published we post the peer reviewers' comments and the authors' responses online. We also post the versions of the paper that were used during peer review. These are the versions that the peer review comments apply to.

The versions of the paper that follow are the versions that were submitted during the peer review process. They are not the versions of record or the final published versions. They should not be cited or distributed as the published version of this manuscript.

BMJ Open is an open access journal and the full, final, typeset and author-corrected version of record of the manuscript is available on our site with no access controls, subscription charges or pay-per-view fees (<http://bmjopen.bmj.com>).

If you have any questions on BMJ Open's open peer review process please email [info.bmjopen@bmj.com](mailto:info.bmjopen@bmj.com)

# BMJ Open

## Identification of Plasmodium falciparum and host factors associated with cerebral malaria. A prospective, case-control study (NeuroCM)

|                               |                                                                                                                                                                                                                                                                                                                                                                                                                                                                                                                                                                                                                                                                                                                                                                                                                                                                                                                                                                                                                                                                                                                                                                                                                                                                                                                                                                                                                                                                                                                                                                                                                                                                                                                                                                                                                                                                                                                                                                                                                                      |
|-------------------------------|--------------------------------------------------------------------------------------------------------------------------------------------------------------------------------------------------------------------------------------------------------------------------------------------------------------------------------------------------------------------------------------------------------------------------------------------------------------------------------------------------------------------------------------------------------------------------------------------------------------------------------------------------------------------------------------------------------------------------------------------------------------------------------------------------------------------------------------------------------------------------------------------------------------------------------------------------------------------------------------------------------------------------------------------------------------------------------------------------------------------------------------------------------------------------------------------------------------------------------------------------------------------------------------------------------------------------------------------------------------------------------------------------------------------------------------------------------------------------------------------------------------------------------------------------------------------------------------------------------------------------------------------------------------------------------------------------------------------------------------------------------------------------------------------------------------------------------------------------------------------------------------------------------------------------------------------------------------------------------------------------------------------------------------|
| Journal:                      | <i>BMJ Open</i>                                                                                                                                                                                                                                                                                                                                                                                                                                                                                                                                                                                                                                                                                                                                                                                                                                                                                                                                                                                                                                                                                                                                                                                                                                                                                                                                                                                                                                                                                                                                                                                                                                                                                                                                                                                                                                                                                                                                                                                                                      |
| Manuscript ID                 | bmjopen-2018-027378                                                                                                                                                                                                                                                                                                                                                                                                                                                                                                                                                                                                                                                                                                                                                                                                                                                                                                                                                                                                                                                                                                                                                                                                                                                                                                                                                                                                                                                                                                                                                                                                                                                                                                                                                                                                                                                                                                                                                                                                                  |
| Article Type:                 | Protocol                                                                                                                                                                                                                                                                                                                                                                                                                                                                                                                                                                                                                                                                                                                                                                                                                                                                                                                                                                                                                                                                                                                                                                                                                                                                                                                                                                                                                                                                                                                                                                                                                                                                                                                                                                                                                                                                                                                                                                                                                             |
| Date Submitted by the Author: | 25-Oct-2018                                                                                                                                                                                                                                                                                                                                                                                                                                                                                                                                                                                                                                                                                                                                                                                                                                                                                                                                                                                                                                                                                                                                                                                                                                                                                                                                                                                                                                                                                                                                                                                                                                                                                                                                                                                                                                                                                                                                                                                                                          |
| Complete List of Authors:     | <p>Joste, Valentin; MERIT, IRD<br/> Maurice, Laurine; MERIT, IRD; PHARMADEV, IRD<br/> Bertin, Gwladys; MERIT, IRD<br/> Aubouy, Agnès; PHARMADEV, IRD<br/> Boumédiène, Farid; INSERM UMR 1094, Tropical Neuroepidemiology<br/> Houzé, Sandrine; MERIT, IRD; Hopital Bichat - Claude-Bernard, Parasitology laboratory<br/> Daniel Ajzenberg , Daniel Ajzenberg ; Inserm UMR 1094, Tropical Neuroepidemiology<br/> Argy, Nicolas; MERIT, IRD; Hopital Bichat - Claude-Bernard, Parasitology laboratory<br/> Massougbodji, Achille; Institut de Recherche Clinique du Bénin<br/> Dossou-Dagba, Ida; Calavi Hospital, Pediatric department<br/> Alao, Jules; CHU-MEL Hospital, Pediatric department<br/> Cot, Michel; MERIT, IRD<br/> Deloron, Philippe; MERIT, IRD<br/> Faucher, Jean-François; Inserm UMR 1094, Tropical Neuroepidemiology<br/> Affolabi, Dissou; Calavi Hospital, Pediatric department<br/> Authier, Hélène; PHARMADEV, IRD<br/> Ayedadjou, Linda; Hopital Bichat - Claude-Bernard<br/> Biokou, Bibiane; CHU-MEL hospital, Pediatric department<br/> Coste, Agnès; PHARMADEV, IRD<br/> Degbelo, Jean-Eudes; Institut de Recherche Clinique du Bénin<br/> Dramane, Latifou; Hopital Bichat - Claude-Bernard, Parasitology laboratory<br/> Jafari-Guemouri, Sayeh; MERIT, IRD<br/> Kamaliddin, Claire; MERIT, IRD<br/> Kinkpe, Elisée; Hopital Bichat - Claude-Bernard<br/> Labrunie, Anais; Inserm UMR 1094, Tropical Neuroepidemiology<br/> Ladipo, Yélé; CHU-MEL hospital, Pediatric department<br/> Lathiere, Thomas; Inserm UMR 1094, Tropical Neuroepidemiology<br/> Mowendabeka, Audrey; Inserm UMR 1094, Tropical Neuroepidemiology<br/> Papin, Jade; MERIT, IRD<br/> Pipy, Bernard; Inserm UMR 1094, Tropical Neuroepidemiology<br/> Preux, Pierre-Marie; UMR 1094, Tropical Neuroepidemiology<br/> Raymondeau, Marie; UMR 1094, Tropical Neuroepidemiology<br/> Royo, Jade; PHARMADEV, IRD<br/> Sossou, Darius; Hopital Bichat - Claude-Bernard, Parasitology laboratory<br/> Techer, Brigitte; MERIT, IRD</p> |

1  
2  
3  
4  
5  
6  
7  
8  
9  
10  
11  
12  
13  
14  
15  
16  
17  
18  
19  
20  
21  
22  
23  
24  
25  
26  
27  
28  
29  
30  
31  
32  
33  
34  
35  
36  
37  
38  
39  
40  
41  
42  
43  
44  
45  
46  
47  
48  
49  
50  
51  
52  
53  
54  
55  
56  
57  
58  
59  
60

|           |                                                                                                                               |
|-----------|-------------------------------------------------------------------------------------------------------------------------------|
|           | Vianou, Bertin; Hopital Bichat - Claude-Bernard, Parasitology laboratory                                                      |
| Keywords: | Paediatric neurology < NEUROLOGY, Paediatric infectious disease & immunisation < PAEDIATRICS, TROPICAL MEDICINE, PARASITOLOGY |
|           |                                                                                                                               |

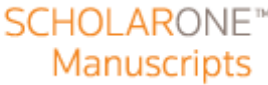

1  
2  
3 1 Identification of *Plasmodium falciparum* and host factors associated with cerebral malaria. A  
4  
5 2 prospective, case-control study (NeuroCM)  
6  
7 3

8  
9  
10 4 Valentin Joste<sup>1</sup>, Laurine Maurice<sup>1,2</sup>, GI Bertin<sup>1</sup>, Agnès Aubouy<sup>2</sup>, Farid Boumédiène<sup>3</sup>, Sandrine  
11  
12 5 Houzé<sup>1,4,9</sup>, Daniel Ajzenberg<sup>3</sup>, Nicolas Argy<sup>1,4,9</sup>, Achille Massougbodji<sup>5</sup>, Ida Dossou-Dagba<sup>6</sup>, Jules  
13  
14 6 Alao<sup>7</sup>, Michel Cot<sup>1</sup>, Philippe Deloron<sup>1</sup>, Jean François Faucher<sup>3,8</sup> and the NeuroCM group.  
15  
16  
17 7

18  
19 8 <sup>1</sup>. MERIT, IRD, Université Paris 5, Sorbonne Paris Cité, Paris, 75006, France  
20

21 9 <sup>2</sup>. PHARMADEV, IRD, Université Paul Sabatier Toulouse III, Toulouse, France  
22

23  
24 10 <sup>3</sup>. NET, INSERM, Université de Limoges, Limoges, France  
25

26 11 <sup>4</sup>. Laboratoire de Parasitologie-Mycologie, AP-HP, Hôpital Bichat, Paris  
27

28 12 <sup>5</sup>. Institut de Recherche Clinique du Bénin (IRCB), Calavi, Benin  
29

30 13 <sup>6</sup>. Pediatric Department, Calavi Hospital, Calavi, Benin  
31  
32

33 14 <sup>7</sup>. Pediatric Department, Mother and Child University and Hospital Center (CHUMEL), Cotonou,  
34  
35 15 Benin.  
36

37 16 <sup>8</sup>. Department of Infectious Diseases, Limoges University Hospital, Limoges, France  
38

39 17 <sup>9</sup>. National French Malaria Reference Center, Bichat-Claude Bernard hospital, Paris  
40  
41  
42 18

43  
44 19 **NeuroCM group**: Dissou Affolabi<sup>6</sup>, Hélène Authier<sup>2</sup>, Linda Ayedadjou<sup>4</sup>, Bibiane Biokou<sup>7</sup>, Agnès  
45  
46 20 Coste<sup>2</sup>, Jean-Eudes Degbelo<sup>5</sup>, Latifou Dramane<sup>4</sup>, Sayeh Jafari-Guemouri<sup>1</sup>, Claire Kamaliddin<sup>1</sup>,  
47  
48 21 Elisée Kinkpe<sup>4</sup>, Anaïs Labrunie<sup>3</sup>, Yélé Ladipo<sup>7</sup>, Thomas Lathiere<sup>3</sup>, Audrey Mowendabeka<sup>3</sup>, Jade  
49  
50 22 Papin<sup>1</sup>, Bernard Pipy<sup>2</sup>, Pierre-Marie Preux<sup>3</sup>, Marie Raymondeau<sup>3</sup>, Jade Royo<sup>2</sup>, Darius Sossou<sup>4</sup>,  
51  
52 23 Brigitte Techer<sup>1</sup>, Bertin Vianou<sup>4</sup>.  
53  
54  
55  
56 24

1  
2  
3 25 **Corresponding author:**  
4

5 26 Joste Valentin, MERIT, IRD, Université Paris 5, Sorbonne Paris Cité, Paris, 75006, France

7 27 Phone: +33617435543

9 28 Email: valentinjoste@gmail.com  
10  
11  
12 29

13  
14 30 **Abstract**

15  
16 31 **Introduction:** In 2016, an estimated 216 million cases and 445,000 deaths of malaria occurred  
17  
18 32 worldwide, in 91 countries. Most cases and deaths were in the African region (respectively 88%  
19  
20 33 and 90%), including Benin, located in West Africa. In Benin, malaria causes 26.8% of disease  
21  
22 34 report in the general population and 20.9% in children under five years old.

23  
24 35 The goal of the NeuroCM project is to identify the causative and remedial factors of  
25  
26 36 neuroinflammation in the context of cerebral malaria. There are currently very few systematic data  
27  
28 37 from West Africa on the etiologies and management of non-traumatic coma in small children, and  
29  
30 38 NeuroCM will help to fill this gap. We postulate that an accurate understanding of molecular and  
31  
32 39 cellular mechanisms involved in neuroinflammation may help to define efficient strategies to  
33  
34 40 prevent and manage cerebral malaria.

35  
36 41 **Methods and analysis:** This is a prospective, case-control study comparing cerebral malaria to  
37  
38 42 uncomplicated malaria and non-malarial coma. This study takes place in Benin, precisely in  
39  
40 43 Cotonou for the hospital's recruitment. Uncomplicated malaria recruitment proceeds in Sô-Ava  
41  
42 44 district. We aim to include 300 children between 24 and 71 months divided in three different  
43  
44 45 clinical groups during 12 months (from December 2017 to November 2018). Study data, including  
45  
46 46 clinical, biological and research results will be collected and managed using CS online-Ennov  
47  
48 47 clinical.  
49  
50  
51  
52  
53  
54  
55  
56  
57  
58  
59  
60

1  
2  
3 48 **Ethics and dissemination:** Ethics approval for the NeuroCM study has been obtained from *Comité*  
4  
5 49 *National d’Ethique pour la Recherche en santé* of Benin  
6  
7 50 (n°67/MS/DC/SGM/DRFMT/CNERS/SA; 10/17/2017). NeuroCM study has also been approved  
8  
9 51 by *Comité consultatif de déontologie et d’éthique* of Institut de Recherche pour le Développement  
10  
11 52 (IRD; 10/24/2017)  
12  
13  
14  
15  
16

### 17 54 **Strengths and limitations of this study**

- 18  
19 55 ➤ This case-control study aims to identify the causative and remedial factors of  
20  
21 56 neuroinflammation in the context of cerebral malaria  
22  
23 57 ➤ This study will inform on the etiologies and management of non-traumatic coma in small  
24  
25 58 children  
26  
27 59 ➤ The final products of NeuroCM are expected to feed the pipeline of new therapeutic  
28  
29 60 (immune intervention) and preventive (vaccine) strategies that will improve cerebral  
30  
31 61 malaria outcome  
32  
33 62 ➤ This study does not have the power to investigate all etiologies of fever in Benin. Contrary  
34  
35 63 to the malaria groups, there is no information on the frequency of non-malaria coma  
36  
37 64 admissions, and no certainty on the number of children who will included in the non-  
38  
39 65 *Plasmodium* group.  
40  
41 66 ➤ According to the low number of patients, conclusions will further need to be confirmed in  
42  
43 67 larger studies  
44  
45  
46  
47  
48  
49  
50  
51  
52  
53  
54  
55  
56  
57  
58  
59  
60

## 69 Introduction

70 Malaria is triggered by an apicomplexan parasite, *Plasmodium spp.* Six *Plasmodium* species can  
71 infect humans, with *Plasmodium falciparum* (*P. falciparum*) being the most frequent in Sub-  
72 Saharian Africa (99% of estimated cases in 2016). *P. falciparum* is the agent of severe malaria and  
73 responsible for most malarial deaths.

74 In 2016, an estimated 216 million cases and 445,000 deaths of malaria occurred worldwide, in 91  
75 countries<sup>1</sup>. Despite a recent decrease in malaria mortality due to extensive malaria control through  
76 insecticide impregnated bednets and increased use of artemisinin derivatives, 275,000 children still  
77 die every year from malaria. Most cases and deaths were in African region (respectively 88% and  
78 90%). Severe malaria occurs mostly in non-immune patients and in Sub-Saharan Africa, 90% of  
79 severe malaria affect young children<sup>2</sup>. In endemic states, malaria is one of the three major causes  
80 of hospitalization in children under five years old.

81 Benin is in West Africa, along the Guinea gulf. In 2018, 11.5 million people live in Benin, most of  
82 them in South-Benin. Malaria transmission occurs seasonally, during rainy seasons (from May to  
83 August and October). According to the Beninese health department in 2016, malaria is responsible  
84 for 26.8% of disease reports in consultation and hospitalization in the general population and for  
85 20.9% in children under five years old<sup>3</sup>. It is also the first morbidity cause in the general population  
86 with a prevalence of 39.7% in 2013, followed by respiratory infections in 12.4% cases and gastro-  
87 intestinal disease for 6.4%<sup>4</sup>.

88 According to the World Health Organization (WHO), severe *falciparum* malaria is defined by the  
89 association between *P. falciparum* asexual parasitaemia and the presence of one or more of the  
90 clinical or laboratory features (with no other confirmed cause for their symptoms) presented in  
91 table 1. Cerebral malaria is defined by the presence of asexual form of *P. falciparum* associated  
92 with Blantyre score  $\leq 2$  Table 2). Cerebral malaria is a coma which persists for  $> 1$ h after a seizure

1  
2  
3 93 irrespective of anticonvulsant medications. But clinical criteria for cerebral malaria diagnosis are  
4  
5 94 currently debated. Some study highlighted that *P. falciparum* parasitaemia can be observed in  
6  
7 95 comatose children with a non-malarial central nervous system disease requiring another treatment  
8  
9 96 than antimalarials<sup>5</sup>. Diagnostic of cerebral malaria could therefore be overestimated. A recent study  
10  
11 97 in Malawi found that 25% of cerebral malaria cases were misdiagnosed and that many children  
12  
13 98 may have had a viral meningoencephalitis concomitant to a malarial infection<sup>5</sup>. Implementation of  
14  
15 99 fundoscopic examination (in order to look for malaria retinopathy signs)<sup>6</sup> and microbiological  
16  
17 100 investigations (blood culture, cerebrospinal fluid (CSF) culture, CSF multiplex PCR) could limit  
18  
19 101 the overestimation of cerebral malaria diagnosis, but fundoscopic examination requires trained  
20  
21 102 physicians and microbiological investigations are expensive. Clinical research needs to focus on  
22  
23 103 new clinical or diagnostic tools designed to help physicians in order to better diagnose cerebral  
24  
25 104 malaria.

26  
27 105 NeuroCM study aims to collect data (such as blood and cerebrospinal fluid culture, fundoscopic  
28  
29 106 examination) on coma's etiologies in Beninese young children.

30  
31 107 Without treatment, cerebral malaria is invariably fatal. Even with parenteral artemisinin use, severe  
32  
33 108 malaria death rate is 20%<sup>7</sup>. In case of severe or cerebral malaria, patients should be hospitalized in  
34  
35 109 an intensive care unit. Conscience status, blood pressure, heart and respiratory rates, diuresis and  
36  
37 110 oxygen saturation have to be monitored every six hours<sup>8</sup>. Parenteral artemisinin instead of quinine  
38  
39 111 is recommended at a posology of 2.4 mg/kg by injection (3 mg/kg in children under 20 kg of body  
40  
41 112 weight) at diagnosis, 12 and 24 hours later and then daily until patients can take oral drugs<sup>7</sup>.  
42  
43 113 Benzodiazepine should be used to treat convulsions (diazepam 0.3 mg/kg; midazolam or  
44  
45 114 lorazepam). It seems accepted that cerebral malaria surviving patients generally don't present any  
46  
47 115 neurological sequelae and fully recover their neurological capacity. However, immediate  
48  
49 116 neurological after-effect is described in 6.7 to 11.6% of cases<sup>79</sup> and a recent meta-analysis found a



1  
2  
3 117 relation between cerebral malaria and neurologic disease<sup>10</sup>. The NeuroCM study will collect data  
4  
5 118 on children's clinical recovery at discharge and 1 month later.

6  
7 119 Control means for malaria are less and less effective due to multiple parasite and vector  
8  
9 120 mechanisms of resistance. First, *P. falciparum* drug resistance is a growing concern. Resistance to  
10  
11 121 chloroquine, one of the main anti-malarial drugs, appeared during the sixties in South-East Asia  
12  
13 122 and then spread to Africa<sup>1112</sup>. Artemisinin-combined therapy became the treatment of choice for  
14  
15 123 malaria to reduce the risk of parasites developing resistance<sup>13</sup>. But artemisinin-resistance appeared  
16  
17 124 in South-East Asia in 2008<sup>14</sup> and was confirmed by others studies<sup>15</sup>. It has not, hitherto, spread to  
18  
19 125 Africa but this is a real concern for the WHO<sup>16</sup>. On the other hand, mosquitos become more and  
20  
21 126 more resistant to insecticides, making antivectorial prevention more and more difficult<sup>17</sup>. For those  
22  
23 127 different reasons, research for new therapies is important and needs to be developed.

24  
25  
26 128 Pathophysiology of cerebral malaria is complex and multifactorial, based on both parasite and host  
27  
28 129 immune factors. It is currently believed that cerebral malaria is caused by dedicated parasite  
29  
30 130 variants that specifically localize in brain through interaction between parasite proteins expressed  
31  
32 131 on the surface of the infected erythrocytes (iE) and brain endothelium. This sequestration occurs  
33  
34 132 with erythrocytes infected with late stage of *P. falciparum* (trophozoites and schizonts). Binding  
35  
36 133 of iE to endothelial vascular cells is mediated by Variant Surface Antigens (VSA). *Plasmodium*  
37  
38 134 virulence is linked to its ability to express VSA<sup>18</sup>. VSA includes three different multigenic families:  
39  
40 135 *var*, *rifin* and *stevor*. More specifically, *var* genes coding for PfEMP1 proteins are highly  
41  
42 136 polymorphic and present in sixty copies in *P. falciparum* genome. Those PfEMP1 are expressed  
43  
44 137 on iE surface and are responsible for endothelial receptors binding, such as Chondroitin Sulfate A  
45  
46 138 (CSA) and Endothelial Protein C Receptor (EPCR) or InterCellular Adhesion Molecule (ICAM)  
47  
48 139 respectively involved in placental malaria<sup>19</sup> and severe malaria<sup>20</sup>. PfEMP1 family has been clearly  
49  
50 140 associated with binding of iE to the microvascular endothelium of every organ and tissue<sup>21</sup>. We

1  
2  
3 141 now better understand iE's binding on placenta<sup>22</sup> and vaccine development to prevent gestational  
4  
5 142 malaria seems an achievable goal. By contrast, research is still needed to understand which type of  
6  
7 143 proteins specifically binds to cerebral endothelial receptor. In a previous study conducted in Benin,  
8  
9 144 we identified several proteins associated with cerebral malaria<sup>23</sup>.

11  
12 145 The finding of a PfEMP1 specifically related to cerebral malaria could pave the way to the  
13  
14 146 development of a vaccine targeting this specific protein. Studying the transcriptomic and proteomic  
15  
16 147 profiles of plasmodial strains involved in cerebral malaria compared to strains involved in  
17  
18 148 uncomplicated malaria is a first step to better understand related mechanisms to cerebral  
19  
20 149 endothelium binding.

21  
22  
23  
24 150 The host immune aspect of the pathophysiology of cerebral malaria are the consequences of  
25  
26 151 microvascular sequestration of iEs and rosettes (non-infected red blood cells) in brain. Such  
27  
28 152 sequestration leads to blood flow obstruction, ischemia/hypoxia and local inflammation resulting  
29  
30 153 in neuroinflammation<sup>24-28</sup>. The way this cascade of events is linked and the reasons why they result  
31  
32 154 in death or inflammation resolution remains to be elucidated. Acute cerebral ischemia is known to  
33  
34 155 drive microglia activation and influx of myeloid immune cells to the brain. Resident microglia and  
35  
36 156 infiltrating monocytes/neutrophils have a critical role in initiating, sustaining (M1 polarization) and  
37  
38 157 resolving (M2 polarization) post-ischemic inflammation<sup>29-31</sup>. Another important immune aspect of  
39  
40 158 neuroinflammation during cerebral malaria is redox equilibrium. The production reactive oxygen  
41  
42 159 species both by parasites (haemoglobin digestion) and monocytes/macrophages are thought to  
43  
44 160 cause damages to neurons<sup>32</sup>. This process leads to BBB permeability and neurodegeneration<sup>33,34</sup>.  
45  
46  
47  
48  
49 161 To counterbalance the excess of oxidants, oxidant scavengers and antioxidant enzymes may be  
50  
51 162 produced. In the NeuroCM study, we intend to better understand mechanisms of  
52  
53 163 neuroinflammation and its resolution in a context of cerebral malaria, by comparing data collected  
54  
55 164 in children presenting with cerebral malaria, in children hospitalised for non-malaria non-traumatic

1  
2  
3 165 coma, and in children with uncomplicated malaria. We will focus our studies on markers of immune  
4  
5 166 cell migration and polarization (towards inflammatory or resolutive phenotypes), and of pro- or  
6  
7 167 anti-oxidant response, through urine and blood samples analysis at inclusion, 3 and 21 to 28 days  
8  
9 168 post-inclusion.  
10  
11  
12  
13

14 169  
15 170 **Study objectives**  
16  
17 171 The main objective is to identify the causative and remedial factors of neuroinflammation in the  
18  
19 172 context of cerebral malaria. There are currently very few systematic data from West Africa on the  
20  
21 173 etiologies and management of non-traumatic coma in small children, and NeuroCM will bring new  
22  
23 174 information on these aspects. We postulate that an accurate understanding of molecular and cellular  
24  
25 175 mechanisms involved in neuroinflammation may help to define efficient strategies to prevent and  
26  
27 176 manage cerebral malaria.  
28  
29  
30

31 177  
32  
33 178 There are three distinct objectives in this study.  
34  
35

36 179  
37 180 *I. To identify parasitological factors associated with P. falciparum cerebral malaria or*  
38  
39  
40 181 *uncomplicated malaria*  
41

42 182 We expect to identify and validate *P. falciparum* virulence factors associated with cerebral malaria  
43  
44 183 by comparison with uncomplicated malaria. Once proteins of interest will be found, functional  
45  
46 184 studies will help to better understand their role in cerebral malaria.  
47  
48

49 185  
50  
51 186 *II. To identify immune host factors associated with fatal of favourable outcome of*  
52  
53 187 *cerebral malaria*  
54  
55  
56  
57  
58  
59

1  
2  
3 188 We expect to better understand which mechanisms trigger neuroinflammation and its resolution  
4  
5 189 during cerebral malaria by comparing three groups of children: presenting with cerebral malaria,  
6  
7 190 hospitalised for non-malaria non-traumatic coma, and presenting with uncomplicated malaria. We  
8  
9 191 aim to identify therapeutic molecular targets involved in neuroinflammation resolution.  
10  
11  
12  
13

14 193 *III. To describe coma's etiology in Sub-Saharan Africa*

15  
16  
17 194 We expect to improve knowledge in non-traumatic coma's etiologies in Sub-Saharan Africa in  
18  
19 195 order to improve young children's coma management and inform health public policies on the role  
20  
21 196 played by infections that could be prevented by vaccination.  
22  
23  
24  
25

26 198 **Methods and analysis**

27  
28 199 Design

29  
30  
31 200 This is a prospective, case-control study comparing cerebral malaria to uncomplicated malaria and  
32  
33 201 non-*Plasmodium* coma. Patients will be recruited in South Benin, in two different hospitals for  
34  
35 202 coma and in a dispensary for uncomplicated malaria. Conversely, uncomplicated malaria is rarely  
36  
37 203 detected in hospitals. This study is conducted by one Beninese research team (CERPAGE, Centre  
38  
39 204 d'Etude et de Recherche sur le Paludisme Associé à la Grossesse et à l'Enfance) and three French  
40  
41 205 research teams (UMR D216 MERIT in Paris carrying the project, UMR D152 PHARMADEV in  
42  
43 206 Toulouse, UMR S1094 NET in Limoges).  
44  
45  
46  
47  
48

49 208 Study environment

50  
51 209 This study takes place in Benin, precisely in Cotonou and Calavi for the hospital's recruitment.  
52  
53 210 Uncomplicated malaria recruitment takes place in Sô-Ava district. Cotonou is the largest city and  
54  
55 211 economic centre of Benin, with an estimated population of 679,012 habitants in 2013.  
56  
57  
58  
59  
60

1  
2  
3 212 The two recruitment hospitals are the CHU-MEL (CHU-Mère et Enfant de la Lagune) and Hôpital  
4  
5 213 de zone de Calavi. Routine laboratory analysis, except bacteriology, are performed on site for  
6  
7 214 children included with coma and at IRCB (Institut de Recherche Clinique du Bénin) for children  
8  
9 215 with uncomplicated malaria. Bacteriological analyses are performed in the microbiology laboratory  
10  
11 216 of CNHU (Centre National Hospitalier Universitaire). Research analyses are done in the  
12  
13  
14 217 CERPAGE laboratory.  
15  
16

### 17 218

### 18

### 19 219 Participants

20  
21 220 We aim to include 3 different clinical groups of 100 children between 24 and 71 months during 12  
22  
23 221 months (from December 2017 to November 2018). This duration has been determined according  
24  
25 222 to previous studies in Benin<sup>35</sup>.

26  
27 223 In the **first group**, a diagnosis of cerebral malaria will be defined as follows: positive *P. falciparum*  
28  
29 224 parasitaemia with a Blantyre score  $\leq 2$  with exclusion of patients presenting: positive bacteraemia,  
30  
31 225 meningitidis proved or suspected (leucocytes in cerebrospinal fluid  $> 1000$  per microliter and/or  
32  
33 226 Gram positive in LCS and/or LCS bacterial culture positive and/or PCR positive for any bacteria  
34  
35 227 or virus).

36  
37 228 In the **second group**, a diagnosis of non-malarial non-traumatic coma will be defined as follows:  
38  
39 229 Blantyre score  $\leq 2$  and no *Plasmodium* infection as detected by thick blood smear.

40  
41 230 In the **third group**, uncomplicated *falciparum* malaria will be defined as follows: 1) fever at  
42  
43 231 inclusion or within 24 hours before, 2) no clinical or biological sign of severe malaria (table 1), no  
44  
45 232 danger signs and no other obvious cause of fever and 3) parasitaemia between 1,000 to 500,000  
46  
47 233 parasites per microliter.  
48  
49  
50  
51  
52

### 53 234

### 54

### 55

### 56 235 Inclusion and exclusion criteria

1  
2  
3 236 For all children, the first inclusion criterion is parental acceptance that their child participate in the  
4  
5 237 study after information has been given (see section “Ethics and safety considerations”). Inclusion  
6  
7 238 criteria for coma (cerebral malaria and non-*Plasmodium* coma) are: age between 24 to 71 months,  
8  
9 239 Blantyre score  $\leq 2$ , negative HIV Rapid Diagnostic Test (RDT). Non-inclusion criteria are: pre-  
10  
11 240 existent neurologic disease and traumatic or toxic coma.

12  
13  
14 241 Inclusion criteria for uncomplicated *falciparum* malaria are: age between 24 to 71 months, fever  $>$   
15  
16 242  $38^{\circ}\text{C}$  at inclusion or within 24 hours before and no clinical severity/danger sign, positive malaria  
17  
18 243 RDT, negative HIV RDT.

19  
20  
21 244 Exclusion criteria for coma are: thick and thin blood smear not realized at day 0 (D0) and/or  
22  
23 245 biological blood test no realized at D0 and/or research blood test not realized at D0.

24  
25  
26 246 Exclusion criteria for uncomplicated *falciparum* malaria are: thick and thin blood smear not  
27  
28 247 realized at day 0 (D0) and/or biological blood test no realized at D0 and/or research blood test not  
29  
30 248 realized at D0 and/or laboratory indices for severe malaria and/or thick and thin blood smear  
31  
32 249 negative for *P. falciparum* and/or parasite density under 1000 parasite per microliter or higher than  
33  
34 250 500,000 parasites per microliter.

35  
36  
37 251

## 38 39 40 252 Recruitment process

### 41 42 253 *Step 1: Enrolment/screening*

43  
44 254 The first step is patients’ screening to confirm study eligibility and provide participants with  
45  
46 255 information about the study. A questionnaire assessing eligibility will inform on home addresses,  
47  
48 256 sociodemographic data (number of children in the family, ethnical group...), clinical history, use  
49  
50 257 of mosquito net and vaccination status. Informed consent is then obtained from the parents or  
51  
52 258 caregivers.

1  
2  
3 259 The following tests are performed to screen for malaria and to rule out HIV infections: a RDT  
4  
5 260 detecting HRP2 for *P. falciparum* detection and Determine HIV-1/2 set, Alere for HIV detection.

7  
8 261 *Step 2: Clinical examination and biological sample/analysis*

9  
10 262 A clinical examination is performed by a study physician for children hospitalised with coma, and  
11  
12 263 by a study nurse for uncomplicated malaria. In the coma group, a fundoscopic assessment is  
13  
14 264 performed (Eyepax 1.0 Dioptrix) and pictures are captured and downloaded on an online database.

15  
16  
17 265 The clinical data entry is performed on an online case report form.

18  
19 266 In order to allocate children to their respective groups, biological analyses according to severe  
20  
21 267 malaria are needed. For coma's inclusion: thick and thin blood smear analysis, complete blood  
22  
23 268 count (CBC) (Sysmex KX-21N, Sysmex XT-1800i and ABS Micro ES 60), biochemistry analysis  
24  
25 269 ( $\text{Na}^+$ ,  $\text{K}^+$ ,  $\text{Cl}^-$ ,  $\text{Ca}^{++}$ ,  $\text{HCO}_3^-$ , albumin, urea, creatinine, glucose, lactate) with Piccolo Sysmex and  
26  
27 270 ALAT plus bilirubine (Biolabo Kenza Max biochemistry and Mindray BS-200) are performed on  
28  
29 271 site. Blood culture, Gram staining and bacterial culture for cerebrospinal fluid are realized in a  
30  
31 272 university hospital reference laboratory. Biomérieux Biofire™ FilmArray™  
32  
33 273 Meningitis/Encephalitis Panel multiplex PCR (looking for *E. coli*, *H. influenzae*, *L.*  
34  
35 274 *monocytogenes*, *N. meningitidis*, *S. agalactiae*, *S. pneumoniae*, cytomegalovirus, enterovirus,  
36  
37 275 Epstein-Barr virus, herpes simplex virus (HSV) 1, HSV2, human herpesvirus 6, paraechovirus,  
38  
39 276 varicella zona virus and *Cryptococcus neoformans* and *C. gattii*) will be further performed in  
40  
41 277 France. The required following samples are needed: one EDTA tube (2 mL), one heparin tube (2  
42  
43 278 mL), one cerebrospinal sample (1 mL), one blood sample for blood culture (5 mL) for routine  
44  
45 279 analyses, two additional EDTA tubes (6 mL) and 50 mL of urine for research analyses.

46  
47 280 For uncomplicated malaria inclusions: severe malaria was ruled out according to results from blood  
48  
49 281 cell count (Sysmex XS500i), biochemistry analysis (bilirubine, glucose, creatinine) on Selectra pro  
50  
51 282 automate (Elitech group) and thick blood smear. The following samples are needed: one EDTA

1  
2  
3 283 tube (2 mL), one heparin tube (2 mL) and one fluorinated tube (2mL) for routine analyses, two  
4  
5 284 additional EDTA tubes (6 mL) and 50 ml of urine for research analyses.  
6

7  
8 285 *Step 3: Research analyses*  
9

10 286 A part of research analyses is realized in Cerpage lab. One to 1.5 mL of blood is cultured in  
11  
12 287 supplemented Roswell Park Memorial Institute (RPMI) 1640 medium with Albumax (Gibco) for  
13  
14 288 less than 48 hours until they reach the mature stage (from young trophozoite to schizont), then  
15  
16 289 purified using magnetic-activated cell sorting (MACS; Milteny Biotec, Bergisch Gladbach,  
17  
18 290 Germany) for binding and endothelial cell activation assay. The resulting mature stage are stored  
19  
20 291 at -80°C for further mass spectrometry protein analysis. Two hundreds µL of whole blood samples  
21  
22 292 are conserved at -20°C for DNA analysis, 200 µL are transferred in TRIzol reagent (Life  
23  
24 293 technologies, France) and stored at -80°C for further RNA extraction<sup>36</sup>, and 200 µL in liquid  
25  
26 293 nitrogen for parasite cryoconservation. Plasma samples are conserved at -20°C and -80°C  
27  
28 294 respectively for immune response analysis and dosage of biomarkers. Peripheral blood  
29  
30 295 mononuclear cells (PBMC) are separated from red blood cells by Ficoll density gradient and stored  
31  
32 296 in liquid nitrogen. Finally, urine are stored at -80°C for further analysis. See table 3 for detailed  
33  
34 297 research planning.  
35  
36 298  
37  
38  
39

40 299 Parasite factors analyses will be performed in several ways. We will compare CM and UM isolates  
41  
42 300 with whole genome DNA sequencing (Sanger Institute, MalariaGen consortium, Illumina  
43  
44 301 technology); RNA-sequencing and by quantitative MS analysis. Highly polymorphic *var* genes  
45  
46 302 will be assembled and BLASTed against peptide hits from the MS approach. Nucleotide primers  
47  
48 303 will be designed with DNA-sequencing data and used in RT-qPCR to validate the RNA-seq data.  
49  
50 304 Associations between gene polymorphisms and modifications in RNA nature and quantity detected  
51  
52 305 by RNA-seq will be investigated. Then, we will use recombinant protein and *P. falciparum* genome  
53  
54 306 modification by gene disruption to study proteins' role.  
55  
56  
57  
58  
59  
60



1  
2  
3 307 Host factors study will be based on the analysis of PBMC, plasmas and urine samples of the three  
4  
5 308 groups of children. PBMC analysis will focus on the phenotyping of monocytes to distinguish M1  
6  
7 309 and M2-like phenotypes. Plasmas and urine samples will allow to measure redox, pro-/anti-  
8  
9 310 inflammatory and pro-resolving mediators. We will first compare data from the group of cerebral  
10  
11 311 malaria to the two other groups in order to identify the biological markers best related to  
12  
13 312 inflammation and neurological impairment during cerebral malaria. Second, we will analyze data  
14  
15 313 obtained with the two coma groups at inclusion (Day 0), at Day 3 and Day 30 to understand the  
16  
17 314 kinetics of immune events and its relation to death or favorable outcome.  
18  
19  
20  
21

#### 22 315 *Step 4: Coma follow-up*

23  
24 316 In children presenting with coma, blood sample are collected at day 3 (D3) and day 21-28 (D21-  
25  
26 317 28) to collect data on malaria outcome, and for research purpose. One EDTA tube (6 mL) and 50  
27  
28 318 mL urine will be sampled. A clinical assessment is also performed at these day of follow-up.  
29  
30  
31  
32

#### 33 320 Data management

34  
35 321 Data, including clinical, biological and research results are collected and managed using CS online-  
36  
37 322 Ennov clinical (<https://ufrcb.chu-limoges.fr/crfonline/>). It is a secure, web-based application  
38  
39 323 designed to support data capture for research studies. Study participants are identified by a code  
40  
41 324 and have their own account. The two physicians and the nurse were trained to entry the data on  
42  
43 325 included children in the database. Nobody can delete a patient created in the base, except the Data  
44  
45 326 manager.  
46  
47  
48

49 327 Data & Safety Monitoring Board (DSMB), composed by two physicians specialized in infectious  
50  
51 328 disease and one statistician, will review allocation of children to the pre-defined study groups and  
52  
53 329 discuss possible deviations from the expected number of subjects in the groups.  
54  
55  
56  
57  
58  
59  
60

### 331 Data analysis

332 In a first step, descriptive statistics will be realized by calculating mean and standard deviation (sd)  
333 for quantitative variables, and proportion for qualitative variables to determine the main  
334 characteristics of the three clinical groups.

335 Focusing on cerebral and uncomplicated malaria children, Maxquant software and plasmoDB<sup>37</sup>  
336 will be used to compare malaria protein expression between isolates of these two clinical groups.  
337 Transcriptomic data will be analyzed with Galaxy (<https://usegalaxy.org/>) and R software  
338 (<https://www.r-project.org/>)<sup>38</sup>. We will also use free tools from Galaxy as Cufflinks, Htseq-count  
339 and Tophat2. Data normalization will be realized with DESeq2 software, with hypothesis that there  
340 exists gene overexpressed and underexpressed. Transcript expression levels (evaluated with RT-  
341 qPCR) will be compared by Kruskal-Wallis and Wilcoxon tests.

342 Regarding immune response analysis, potential markers related to inflammation and neurological  
343 symptoms will be compared using variance analysis in samples from children from cerebral  
344 malaria, non-malarial coma and uncomplicated malaria groups. In a second step, data will be  
345 analyzed by regression models (linear or logistic depending on the variable analysed) and  
346 hierarchical models for repeated samples over time in blood or urine. The non-*Plasmodium* coma  
347 group will be used as a comparator to analyse specific effect of malaria in neuroinflammation  
348 development.

349

### 350 Patient and public involvement

351 From patients' experience and preference, follow-up of children admitted with coma was scheduled  
352 in order to be able to detect neurological sequelae. The diagnostic workup proposed to all children  
353 included into the study, although not affordable to all patients in routine practice, met parent's  
354 expectations on what health facilities should provide to all patients. All patients were recruited in

1  
2  
3 355 health facilities were they usually seek care, and to that respect patients were involved in their  
4  
5 356 recruitment process. Finally, results will not be disseminated directly to study participants but  
6  
7 357 through peer-reviewed scientific journal and conference presentations.  
8  
9

10 358

## 11 359 **Ethics and dissemination**

### 12 360 Ethics and safety considerations

13  
14  
15  
16  
17 361 Ethics approval for the NeuroCM study has been obtained from *Comité National d’Ethique pour*  
18  
19 362 *la Recherche en santé* of Benin (n°67/MS/DC/SGM/DRFMT/CNERS/SA; 10/17/2017). NeuroCM  
20  
21 363 study has also been approved by the *Comité consultatif de déontologie et d’éthique* of Institut de  
22  
23 364 Recherche pour le Développement (IRD; 10/24/2017).

24  
25  
26 365 Parents/guardians will be given an oral information by the physician or the nurse and an opportunity  
27  
28 366 to ask question and refuse the protocol. Patient’s confidentiality will be ensured and anonymity  
29  
30 367 guaranteed by anonymous coding given at the inclusion.  
31  
32

33 368

### 34 369 Dissemination

35  
36  
37 370 The main benefits of NeuroCM are targeted on people living in malaria endemic countries. The  
38  
39 371 study results will be disseminated through a variety of instruments to ensure that a broad range of  
40  
41 372 both specialists and non-specialists are informed and can properly benefit from the findings. First,  
42  
43 373 through the direct consultations with the WHO’s TDR-MIM, Roll Back Malaria program to reach  
44  
45 374 the wider public health audience; through scientific meetings and peer-reviewed publications in  
46  
47 375 scientific or medical journals to reach the scientific/medical/public health communities; through  
48  
49 376 guidelines targeting the medical and paramedical staff for optimization of severe malaria  
50  
51 377 management, through booklets (e.g. first aid procedures and adapted behaviour in case of  
52  
53 378 emergency) elaborated and adapted to the population of Benin.  
54  
55  
56  
57  
58  
59  
60

1  
2  
3 3794  
5 **380 Discussion**

6  
7  
8 381 Cerebral malaria is the most life-threatening form of malaria with high mortality rate in young  
9  
10 382 children. Mortality related to malaria is still high in children population and accurate cerebral  
11  
12 383 malaria diagnosis remains challenging. Among cerebral malaria surviving children, up to 25% have  
13  
14 384 long-term neuro-cognitive deficits (visual/hearing/cognitive/language impairment/  
15  
16 385 ataxia/hemiparesis/motor deficit...), and 10% show evidence of mental health disorders<sup>39</sup>. As  
17  
18 386 cerebral malaria might be one of the more common causes of epilepsy in malaria-endemic regions,  
19  
20 387 the burden of cerebral malaria neurological sequelae may be largely underestimated, but difficult  
21  
22 388 to estimate because diagnosis is challenging in malaria-endemic regions. Bacterial or viral central  
23  
24 389 nervous system infections may occur in children with malarial infection; this may not only  
25  
26 390 originates overdiagnosis of cerebral malaria, but also may overlooks potential bacterial and viral  
27  
28 391 central nervous system infections.

29  
30  
31  
32  
33 392 The expected impact of NeuroCM is of great magnitude. First, NeuroCM is an attempt to propose  
34  
35 393 improvements for the diagnosis of cerebral malaria. It will provide as far as possible, for the first  
36  
37 394 time in West Africa, an identification of the causes of coma in the study area. Second, thanks to  
38  
39 395 DNA, RNA and protein analyses, NeuroCM will allow to identify new parasite targets for a vaccine  
40  
41 396 to prevent cerebral malaria. Third, NeuroCM will provide data on the kinetics of appearance of  
42  
43 397 inflammatory and pro-resolving molecular and cellular events in brain during cerebral malaria. The  
44  
45 398 role of endogenous mediators in neuroinflammation resolution during cerebral malaria will be  
46  
47 399 clarified, with emphasis on pro-oxidant components and lipid mediators. NeuroCM will also  
48  
49 400 identify markers allowing the definition of an immunological state in the process of  
50  
51 401 neuroinflammation resolution in cerebral malaria patients. Our experimental murine model will  
52  
53 402 allow the formulation of new hypothesis while proof of concept will be achieved through the  
54  
55  
56  
57  
58  
59

1  
2  
3 403 correlation of our proposed targets with patient morbidity and mortality parameters. In the future,  
4  
5 404 it may allow clinicians to better manage cerebral malaria, with specific pro-resolving drugs for  
6  
7  
8 405 instance.

9  
10 406 The final products of NeuroCM are expected to feed the pipeline of new therapeutic (immune  
11  
12 407 intervention) and preventive (vaccine) strategies to improve cerebral malaria outcome, as well as  
13  
14  
15 408 other diseases involving neuroinflammation.

#### 16 17 409 18 19 410 **Authors contributions**

20  
21 411 All authors have substantially contributed to the conception and design of the study. VJ and JFF  
22  
23 412 drafted the manuscript. JFF, SH, PD, AA, MC, DA, NA and GB revised the manuscript. All  
24  
25  
26 413 authors approved the final version to be submitted to the journal.

#### 27 28 414 29 30 31 415 **Collaborators**

32  
33 416 NeuroCM study group: Dissou Affolabi, H el ene Authier, Linda Ayedadjou, Bibiane Biokou,  
34  
35 417 Agn es Coste, Jean-Eudes Degbelo, Latifou Dramane, Sayeh Jafari-Guemouri, Claire Kamaliddin,  
36  
37  
38 418 Elis e Kinkpe, Ana is Labrunie, Y el e Ladipo, Thomas Lathiere, Audrey Mowendabeka, Jade Papin,  
39  
40 419 Bernard Pippy, Pierre-Marie Preux, Marie Raymondeau, Jade Royo, Darius Sossou, Brigitte  
41  
42 420 Techer, Bertin Vianou.

#### 43 44 421 45 46 47 422 **Funding**

48  
49 423 This work was supported by the French Agence Nationale de la Recherche, under contract ANR-  
50  
51 424 17-CEI 7-0001-01.

#### 52 53 425 54 55 56 426 **Competing interests**

1  
2  
3 427 No competing interest.  
4

5 428  
6

7  
8 429 **Word Count**  
9

10 430 3,964 words  
11

12 431  
13

14  
15 432 **References**  
16

- 17 433 1. World Health Organization. World malaria report 2017 Available at:  
18 434 <http://www.who.int/malaria/publications/world-malaria-report-2017/en/>  
19
- 20 435 2. Black RE, Cousens S, Johnson HL, *et al.* Global, regional, and national causes of child  
21 436 mortality in 2008: a systematic analysis. *Lancet* 2010;375:1969–87.
- 23 437 3. Beninese health department. Annuaire des statistiques sanitaires 2016. Available at:  
24 438 [http://www2.sante.gouv.bj/IMG/pdf/annuaire\\_stat\\_pas\\_2016.pdf](http://www2.sante.gouv.bj/IMG/pdf/annuaire_stat_pas_2016.pdf)  
26
- 27 439 4. World Health Organization. Stratégie de coopération de l’OMS avec le Bénin: 2016-2019.  
28 440 Available at: <http://apps.who.int/iris/handle/10665/246191>  
29
- 30 441 5. Mallewa M, Valley P, Faragher B, *et al.* Viral CNS infections in children from a malaria-  
31 442 endemic area of Malawi: a prospective cohort study. *Lancet Glob Health* 2013;1:e153-160.
- 33 443 6. Beare NAV, Taylor TE, Harding SP, *et al.* Malarial retinopathy: a newly established diagnostic  
34 444 sign in severe malaria. *Am J Trop Med Hyg* 2006 Nov;75:790–7.
- 36 445 7. Dondorp AM, Fanello CI, Hendriksen ICE, *et al.* Artesunate versus quinine in the treatment of  
38 446 severe *falciparum* malaria in African children (AQUAMAT): an open-label, randomised trial.  
39 447 *Lancet* 2010;376:1647–57.
- 41 448 ➤ 8. World Health Organization. La prise en charge du paludisme grave – guide pratique.  
42 449 Troisième édition. Available at:  
43 450 <http://www.who.int/malaria/publications/atoz/9789241548526/fr/>  
44
- 45 451 9. Severe malaria. *Trop Med Int Health TM IH* 2014;19 Suppl 1:7–131.
- 47 452 10. Christensen SS, Eslick GD. Cerebral malaria as a risk factor for the development of epilepsy  
49 453 and other long-term neurological conditions: a meta-analysis. *Trans R Soc Trop Med Hyg*  
50 454 2015;109:233–8.
- 52 455 11. Wernsdorfer WH. The development and spread of drug-resistant malaria. *Parasitol Today*  
53 456 1991;7:297–303.  
54  
55  
56  
57  
58  
59

- 1  
2  
3 457 12. Mengesha T, Makonnen E. Comparative efficacy and safety of chloroquine and alternative  
4 458 antimalarial drugs: a meta-analysis from six African countries. *East Afr Med J* 1999;76:314–  
5 459 9.
- 7 460 13. World Health Organization. WHO calls for an immediate halt to provision of single-drug  
8 461 artemisinin malaria pills. Available at:  
9 462 <http://www.who.int/mediacentre/news/releases/2006/pr02/en/>
- 11 463 14. Noedl H, Se Y, Schaecher K, *et al.* Evidence of artemisinin-resistant malaria in western  
12 464 Cambodia. *N Engl J Med* 2008;359:2619–20.
- 15 465 15. Dondorp AM, Nosten F, Yi P, *et al.* Artemisinin resistance in *Plasmodium falciparum* malaria.  
16 466 *N Engl J Med* 2009;361:455–67.
- 18 467 16. World Health Organization. Status report on artemisinin resistance and ACT efficacy. Available  
19 468 at: <http://www.who.int/malaria/publications/atoz/artemisinin-resistance-august2018/en/>
- 21 469 17. World Health Organization. Global report on insecticide resistance in malaria vectors: 2010–  
22 470 2016. Available at: <http://www.who.int/malaria/publications/atoz/9789241514057/en/>
- 24 471 18. Kraemer SM, Smith JD. A family affair: *var* genes, PfEMP1 binding, and malaria disease. *Curr*  
25 472 *Opin Microbiol* 2006;9:374–80.
- 28 473 19. Tuikue Ndam NG, Salanti A, Bertin G *et al.* High level of *var2csa* transcription by *Plasmodium*  
29 474 *falciparum* isolated from the placenta. *J Infect Dis* 2005;192:331–5.
- 31 475 20. Moussiliou A, Alao MJ, Denoed-Ndam L, *et al.* High plasma levels of soluble endothelial  
32 476 protein C receptor are associated with increased mortality among children with cerebral  
33 477 malaria in Benin. *J Infect Dis* 2015;211:1484–8.
- 35 478 21. Miller LH, Baruch DI, Marsh K *et al.* The pathogenic basis of malaria. *Nature* 2002;415:673–9.
- 38 479 22. Tuikue Ndam N, Deloron P. Towards a vaccine against pregnancy-associated malaria. *Parasite*  
39 480 2008 Sep;15:515–21.
- 41 481 23. Bertin GI, Sabbagh A, Argy N, *et al.* Proteomic analysis of *Plasmodium falciparum* parasites  
42 482 from patients with cerebral and uncomplicated malaria. *Sci Rep* 2016;6:26773.
- 44 483 24. White NJ, Turner GDH, Day NPJ, *et al.* Lethal malaria: Marchiafava and Bignami were right.  
45 484 *J Infect Dis* 2013;208:192–8.
- 48 485 25. Berendt AR, Tumer GD, Newbold CI. Cerebral malaria: the sequestration hypothesis.  
49 486 *Parasitol Today* 1994 Oct;10:412–4.
- 51 487 26. Clark IA, Cowden WB, Rockett KA. The pathogenesis of human cerebral malaria. *Parasitol*  
52 488 *Today* 1994;10:417–8.
- 54 489 27. Beare NAV, Harding SP, Taylor TE, *et al.* Perfusion abnormalities in children with cerebral  
55 490 malaria and malarial retinopathy. *J Infect Dis* 2009;199:263–71.

- 1  
2  
3 491 28. Dorovini-Zis K, Schmidt K, Huynh H, *et al.* The neuropathology of fatal cerebral malaria in  
4 492 malawian children. *Am J Pathol* 2011;178:2146–58.
- 6 493 29. McDonough A, Weinstein JR. Neuroimmune Response in Ischemic Preconditioning.  
7 494 *Neurother J Am Soc Exp Neurother* 2016;13:748–61.
- 9 495 30. Kim E, Cho S. Microglia and Monocyte-Derived Macrophages in Stroke. *Neurother J Am Soc*  
10 496 *Exp Neurother* 2016;13:702–18.
- 13 497 31. Xia C-Y, Zhang S, Gao Y, *et al.* Selective modulation of microglia polarization to M2  
14 498 phenotype for stroke treatment. *Int Immunopharmacol* 2015;25:377–82.
- 16 499 32. Kumar A, Barrett JP, Alvarez-Croda D-M, *et al.* NOX2 drives M1-like microglial/macrophage  
17 500 activation and neurodegeneration following experimental traumatic brain injury. *Brain Behav*  
18 501 *Immun* 2016;58:291–309.
- 21 502 33. Pino P, Taoufiq Z, Nitcheu J, *et al.* Blood-brain barrier breakdown during cerebral malaria:  
22 503 suicide or murder? *Thromb Haemost* 2005;94:336–40.
- 24 504 34. Postma NS, Mommers EC, Eling WM, *et al.* Oxidative stress in malaria; implications for  
25 505 prevention and therapy. *Pharm World Sci* 1996;18:121–9.
- 27 506 35. Bertin GI, Lavstsen T, Guillonneau F, *et al.* Expression of the domain cassette 8 *Plasmodium*  
28 507 *falciparum* erythrocyte membrane protein 1 is associated with cerebral malaria in Benin. *PloS*  
29 508 *One* 2013;8:e68368.
- 32 509 36. Ponts N, Chung D-WD, Le Roch KG. Strand-specific RNA-seq applied to malaria samples.  
33 510 *Methods Mol Biol* 2012;883:59–73.
- 35 511 37. Bertin GI, Sabbagh A, Guillonneau F, *et al.* Differential protein expression profiles between  
36 512 *Plasmodium falciparum* parasites isolated from subjects presenting with pregnancy-  
37 513 associated malaria and uncomplicated malaria in Benin. *J Infect Dis* 2013;208:1987–97.
- 39 514 38. Otto TD, Wilinski D, Assefa S, *et al.* New insights into the blood-stage transcriptome of  
40 515 *Plasmodium falciparum* using RNA-Seq. *Mol Microbiol* 2010;76:12–24.
- 43 516 39. Idro R, Kakooza-Mwesige A, Asea B, *et al.* Cerebral malaria is associated with long-term  
44 517 mental health disorders: a cross sectional survey of a long-term cohort. *Malar J* 2016;15:184.

518



| Clinical manifestations                                   | Prognosis value | Frequency in children |
|-----------------------------------------------------------|-----------------|-----------------------|
| Impaired consciousness                                    | +++             | +++                   |
| Respiratory distress                                      | +++             | +++                   |
| Multiple convulsions                                      | +               | +++                   |
| Prostration                                               | +               | +++                   |
| Shock                                                     | +++             | +                     |
| Pulmonary oedema (radiology)                              | +++             | +/-                   |
| Abnormal bleeding                                         | +++             | +/-                   |
| Jaundice                                                  | ++              | +                     |
| Laboratory indices                                        | Prognosis value | Frequency             |
| Severe anemia (hemoglobin < 5g/dL<br>or hematocrit < 15%) | +               | +++                   |
| Hypoglycaemia (< 40 mg/dL)                                | +++             | +++                   |
| Acidosis (bicarbonate < 15 mM)                            | +++             | +++                   |
| Hyperlactemia (lactates > 5 mM)                           | +++             | +++                   |
| Renal impairment (creatinin > 3<br>mg/dL)                 | ++              | +                     |
| Hyperparasitemia (parasitaemia ><br>10%)                  | +/-             | ++                    |

519 Table 1 – Clinical and laboratory criteria for severe malaria (from (4))

520

521

|                                 | Score      |
|---------------------------------|------------|
| <b>Best motor response</b>      |            |
| Localises painful stimulus      | 2          |
| Withdraws limb from pain        | 1          |
| Non-specific or absent response | 0          |
| <b>Verbal response</b>          |            |
| Appropriate cry                 | 2          |
| Moan or inappropriate cry       | 1          |
| None                            | 0          |
| <b>Eye movement</b>             |            |
| Directed                        | 1          |
| Not directed                    | 0          |
| <b>Total</b>                    | <b>0-5</b> |

522 Table 2 – Blantyre score (from (4))

523

| Task                                                                  | Calendar |      |    |    |    |      |    |    |    |      |    |    |
|-----------------------------------------------------------------------|----------|------|----|----|----|------|----|----|----|------|----|----|
|                                                                       | 2017     | 2018 |    |    |    | 2019 |    |    |    | 2020 |    |    |
|                                                                       | T4       | T1   | T2 | T3 | T4 | T1   | T2 | T3 | T4 | T1   | T2 | T3 |
| <b>Cohort recruitment and follow-up</b>                               |          |      |    |    |    |      |    |    |    |      |    |    |
| Area preparation                                                      | ■        | ■    | ■  |    |    |      |    |    |    |      |    |    |
| Inclusion                                                             |          | ■    | ■  | ■  | ■  | ■    | ■  | ■  | ■  |      |    |    |
| Follow-up                                                             |          |      |    |    |    |      |    |    |    |      |    |    |
| Biological samples organization                                       |          | ■    | ■  | ■  | ■  | ■    | ■  | ■  | ■  |      |    |    |
| <b>Parasite factors</b>                                               |          |      |    |    |    |      |    |    |    |      |    |    |
| Parasite whole genome sequencing                                      |          |      |    |    | ■  | ■    | ■  | ■  | ■  |      |    |    |
| Parasite RNA-Sequencing                                               |          |      |    |    | ■  | ■    | ■  | ■  | ■  |      |    |    |
| Mass spectrometry analysis                                            |          |      |    |    |    |      |    | ■  | ■  | ■    |    |    |
| Identified protein validation                                         |          |      |    |    |    |      |    |    |    | ■    | ■  | ■  |
| Protein's role on endothelium activation                              | ■        | ■    | ■  | ■  | ■  |      |    |    |    | ■    | ■  | ■  |
| <b>Host factors</b>                                                   |          |      |    |    |    |      |    |    |    |      |    |    |
| Macrophage M2 kinetics apparition in mice brain                       | ■        | ■    | ■  | ■  | ■  | ■    |    |    |    |      |    |    |
| Endogenous mediator role in neuroinflammation                         |          |      |    |    | ■  | ■    | ■  | ■  | ■  |      |    |    |
| Neuroinflammation markers identification in cerebral malaria patients |          |      |    |    |    |      |    |    |    | ■    | ■  | ■  |
| <b>Results exploitation</b>                                           |          |      |    |    |    |      |    |    |    |      |    |    |
| Database validation                                                   | ■        | ■    | ■  | ■  | ■  | ■    | ■  | ■  | ■  | ■    | ■  | ■  |
| Data analysis                                                         |          |      |    |    |    |      |    |    | ■  | ■    | ■  | ■  |
| Dissemination                                                         |          |      |    |    |    |      |    |    |    |      |    | ■  |

524 Table 3 - Detailed research planning

# BMJ Open

## Identification of Plasmodium falciparum and host factors associated with cerebral malaria. Description of the protocol for a prospective, case-control study (NeuroCM)

|                                 |                                                                                                                                                                                                                                                                                                                                                                                                                                                                                                                                                                                                                                                                                                                                                                                                            |
|---------------------------------|------------------------------------------------------------------------------------------------------------------------------------------------------------------------------------------------------------------------------------------------------------------------------------------------------------------------------------------------------------------------------------------------------------------------------------------------------------------------------------------------------------------------------------------------------------------------------------------------------------------------------------------------------------------------------------------------------------------------------------------------------------------------------------------------------------|
| Journal:                        | <i>BMJ Open</i>                                                                                                                                                                                                                                                                                                                                                                                                                                                                                                                                                                                                                                                                                                                                                                                            |
| Manuscript ID                   | bmjopen-2018-027378.R1                                                                                                                                                                                                                                                                                                                                                                                                                                                                                                                                                                                                                                                                                                                                                                                     |
| Article Type:                   | Protocol                                                                                                                                                                                                                                                                                                                                                                                                                                                                                                                                                                                                                                                                                                                                                                                                   |
| Date Submitted by the Author:   | 08-Jan-2019                                                                                                                                                                                                                                                                                                                                                                                                                                                                                                                                                                                                                                                                                                                                                                                                |
| Complete List of Authors:       | Joste, Valentin; MERIT, IRD<br>Maurice, Laurine; MERIT, IRD; PHARMADEV, IRD<br>Bertin, Gwladys; MERIT, IRD<br>Aubouy, Agnès; PHARMADEV, IRD<br>Boumédiène, Farid; INSERM UMR 1094, Tropical Neuroepidemiology<br>Houzé, Sandrine; MERIT, IRD; Hopital Bichat - Claude-Bernard, Parasitology laboratory<br>Daniel Ajzenberg , Daniel Ajzenberg ; Inserm UMR 1094, Tropical Neuroepidemiology<br>Argy, Nicolas; MERIT, IRD; Hopital Bichat - Claude-Bernard, Parasitology laboratory<br>Massougbodji, Achille; Institut de Recherche Clinique du Bénin<br>Dossou-Dagba, Ida; Calavi Hospital, Pediatric department<br>Alao, Jules; CHU-MEL Hospital, Pediatric department<br>Cot, Michel; MERIT, IRD<br>Deloron, Philippe; MERIT, IRD<br>Faucher, Jean-François; Inserm UMR 1094, Tropical Neuroepidemiology |
| <b>Primary Subject Heading</b>: | Infectious diseases                                                                                                                                                                                                                                                                                                                                                                                                                                                                                                                                                                                                                                                                                                                                                                                        |
| Secondary Subject Heading:      | Paediatrics, Neurology                                                                                                                                                                                                                                                                                                                                                                                                                                                                                                                                                                                                                                                                                                                                                                                     |
| Keywords:                       | Paediatric neurology < NEUROLOGY, Paediatric infectious disease & immunisation < PAEDIATRICS, TROPICAL MEDICINE, PARASITOLOGY                                                                                                                                                                                                                                                                                                                                                                                                                                                                                                                                                                                                                                                                              |
|                                 |                                                                                                                                                                                                                                                                                                                                                                                                                                                                                                                                                                                                                                                                                                                                                                                                            |

SCHOLARONE™  
Manuscripts

1 Identification of *Plasmodium falciparum* and host factors associated with cerebral malaria.

2 Description of the protocol for a prospective, case-control study (NeuroCM)

3

4 Valentin Joste<sup>1</sup>, Laurine Maurice<sup>1,2</sup>, GI Bertin<sup>1</sup>, Agnès Aubouy<sup>2</sup>, Farid Boumédiène<sup>3</sup>, Sandrine  
5 Houzé<sup>1,4,9</sup>, Daniel Ajzenberg<sup>3</sup>, Nicolas Argy<sup>1,4,9</sup>, Achille Massougbodji<sup>5</sup>, Ida Dossou-Dagba<sup>6</sup>,  
6 Jules Alao<sup>7</sup>, Michel Cot<sup>1</sup>, Philippe Deloron<sup>1</sup> on behalf of the NeuroCM group, Jean François  
7 Faucher<sup>3,8</sup>

8

9 <sup>1</sup>. MERIT, IRD, Université Paris 5, Sorbonne Paris Cité, Paris, 75006, France

10 <sup>2</sup>. PHARMADEV, IRD, Université Paul Sabatier Toulouse III, Toulouse, France

11 <sup>3</sup>. NET, INSERM, Université de Limoges, Limoges, France

12 <sup>4</sup>. Laboratoire de Parasitologie-Mycologie, AP-HP, Hôpital Bichat, Paris

13 <sup>5</sup>. Institut de Recherche Clinique du Bénin (IRCB), Calavi, Benin

14 <sup>6</sup>. Pediatric Department, Calavi Hospital, Calavi, Benin

15 <sup>7</sup>. Pediatric Department, Mother and Child University and Hospital Center (CHUMEL),  
16 Cotonou, Benin.

17 <sup>8</sup>. Department of Infectious Diseases, Limoges University Hospital, Limoges, France

18 <sup>9</sup>. National French Malaria Reference Center, Bichat-Claude Bernard hospital, Paris

19

20 **NeuroCM group:** Dissou Affolabi<sup>6</sup>, Hélène Authier<sup>2</sup>, Linda Ayedadjou<sup>4</sup>, Bibiane Biokou<sup>7</sup>,  
21 Agnès Coste<sup>2</sup>, Jean-Eudes Degbelo<sup>5</sup>, Latifou Dramane<sup>4</sup>, Sayeh Jafari-Guemouri<sup>1</sup>, Claire  
22 Kamaliddin<sup>1</sup>, Elisée Kinkpe<sup>4</sup>, Anaïs Labrunie<sup>3</sup>, Yélé Ladipo<sup>7</sup>, Thomas Lathiere<sup>3</sup>, Audrey  
23 Mowendabeka<sup>3</sup>, Jade Papin<sup>1</sup>, Bernard Pipy<sup>2</sup>, Pierre-Marie Preux<sup>3</sup>, Marie Raymondeau<sup>3</sup>, Jade  
24 Royo<sup>2</sup>, Darius Sossou<sup>4</sup>, Brigitte Techer<sup>1</sup>, Bertin Vianou<sup>4</sup>.

25

1  
2  
3 26 **Corresponding author:**  
4

5 27 Joste Valentin, MERIT, IRD, Université Paris 5, Sorbonne Paris Cité, Paris, 75006, France  
6

7 28 Phone: +33617435543  
8

9 29 Email: valentinjoste@gmail.com  
10  
11  
12  
13  
14

15 31 **Abstract**

16 32 **Introduction:** In 2016, an estimated 216 million cases and 445,000 deaths of malaria occurred  
17  
18 33 worldwide, in 91 countries. Most cases and deaths were in the African region (respectively 88%  
19  
20 34 and 90%), including Benin, located in West Africa. In Benin, malaria causes 26.8% of  
21  
22 35 consultation and hospitalization motif in the general population and 20.9% in children under  
23  
24 36 five years old.  
25  
26  
27

28 37 The goal of the NeuroCM project is to identify the causative factors of neuroinflammation in  
29  
30 38 the context of cerebral malaria. There are currently very few systematic data from West Africa  
31  
32 39 on the etiologies and management of non-malarial non-traumatic coma in small children, and  
33  
34 40 NeuroCM will help to fill this gap. We postulate that an accurate understanding of molecular  
35  
36 41 and cellular mechanisms involved in neuroinflammation may help to define efficient strategies  
37  
38 42 to prevent and manage cerebral malaria.  
39  
40  
41

42 43 **Methods and analysis:** This is a prospective, case-control study comparing cerebral malaria to  
43  
44 44 uncomplicated malaria and non-malarial non traumatic coma. This study takes place in Benin,  
45  
46 45 precisely in Cotonou for children with coma and in Sô-Ava district for children with  
47  
48 46 uncomplicated malaria. We aim to include 300 children aged between 24 and 71 months and  
49  
50 47 divided in three different clinical groups during 12 months (from December 2017 to November  
51  
52 48 2018) with a 21-28 days follow-up for coma. Study data, including clinical, biological and  
53  
54 49 research results will be collected and managed using CS online-Ennov clinical.  
55  
56  
57  
58  
59  
60

1  
2  
3 50 **Ethics and dissemination:** Ethics approval for the NeuroCM study has been obtained from  
4  
5 51 *Comité National d’Ethique pour la Recherche en santé* of Benin  
6  
7 52 (n°67/MS/DC/SGM/DRFMT/CNERS/SA; 10/17/2017). NeuroCM study has also been  
8  
9 53 approved by *Comité consultatif de déontologie et d’éthique* of Institut de Recherche pour le  
10  
11 54 Développement (IRD; 10/24/2017)  
12  
13  
14  
15  
16

### 17 56 **Strengths and limitations of this study**

- 18  
19 57 ➤ This case-control study aims to identify the causative factors of neuroinflammation in  
20  
21 58 the context of cerebral malaria  
22  
23 59 ➤ This study will inform on the etiologies and management of non-malarial non-traumatic  
24  
25 60 coma in small children  
26  
27 61 ➤ The final products of NeuroCM are expected to feed the pipeline of new therapeutic  
28  
29 62 (immune intervention) and preventive (vaccine) strategies that will improve cerebral  
30  
31 63 malaria outcome  
32  
33 64 ➤ This study does not have the power to investigate all etiologies of fever in Benin.  
34  
35 65 Contrary to the malaria groups, there is no information on the frequency of non-malarial  
36  
37 66 non-traumatic coma admissions, and no certainty on the number of children who will  
38  
39 67 included in the non-malarial non-traumatic group.  
40  
41 68 ➤ According to the limited number of patients, conclusions will further need to be  
42  
43 69 confirmed in larger studies  
44  
45  
46  
47  
48  
49  
50  
51  
52  
53  
54  
55  
56  
57  
58  
59  
60

## 71 Introduction

72 Malaria is triggered by an apicomplexan parasite, *Plasmodium spp.* Six *Plasmodium* species  
73 can infect humans, with *Plasmodium falciparum* (*P. falciparum*) being the most frequent in  
74 Sub-Saharan Africa (99.7% of estimated cases in 2017). *P. falciparum* is the agent of severe  
75 malaria and responsible for most malarial deaths.

76 In 2017, an estimated 219 million cases and 435,000 deaths of malaria occurred worldwide, in  
77 91 countries<sup>1</sup>. Despite a recent decrease in malaria mortality due to extensive malaria control  
78 through insecticide impregnated bednets and increased use of artemisinin derivatives, 275,000  
79 children still die every year from malaria. Most cases and deaths were in African region  
80 (respectively 92% and 93%). Severe malaria occurs mostly in non-immune patients and in Sub-  
81 Saharian Africa and 90% of severe malaria affect young children<sup>2</sup>. In endemic states, malaria  
82 is one of the three major causes of hospitalization in children under five years old.

83 Benin is in West Africa, along the Guinea gulf. In 2018, 11.5 million people live in Benin, most  
84 of them in South-Benin. Malaria transmission occurs seasonally, during rainy seasons (from  
85 May to August and October). According to the Beninese health department in 2016, malaria is  
86 responsible for 26.8% of disease reports in consultation and hospitalization in the general  
87 population and for 20.9% in children under five years old<sup>3</sup>. It is also the first morbidity cause  
88 in the general population with a prevalence of 39.7% in 2013, followed by respiratory infections  
89 in 12.4% cases and gastro-intestinal disease for 6.4%<sup>4</sup>.

90 According to the World Health Organization (WHO), severe *falciparum* malaria is defined by  
91 the association between *P. falciparum* asexual parasitaemia and the presence of one or more of  
92 the clinical or laboratory features (with no other confirmed cause for their symptoms) presented  
93 in table 1. Cerebral malaria (CM) is defined by the presence of asexual form of *P. falciparum*  
94 associated with Blantyre score  $\leq 2$  (Table 2). CM is a coma which persists for  $> 1$ h after a  
95 seizure irrespective of anticonvulsant medications. Clinical criteria for CM diagnosis are



1  
2  
3 96 currently debated, and it has been highlighted that a *P. falciparum* parasitaemia can be observed  
4  
5 97 in comatose children with coma related to a non-malarial central nervous system disease<sup>5</sup>,  
6  
7 98 leading to a possible overestimation of CM cases. A recent study in Malawi found that 25% of  
8  
9 99 CM cases were misdiagnosed and that many children may have had a viral meningoencephalitis  
10  
11  
12 100 concomitant to a malarial infection<sup>5</sup>. Implementation of fundoscopic examination (in order to  
13  
14 101 look for malaria retinopathy signs)<sup>6</sup> and microbiological investigations (blood culture,  
15  
16 102 cerebrospinal fluid (CSF) culture, CSF multiplex PCR) could limit the overestimation of CM  
17  
18 103 diagnosis, but fundoscopic examination requires trained physicians and microbiological  
19  
20 104 investigations are expensive. Clinical research needs to focus on new clinical or diagnostic tools  
21  
22 105 designed to help physicians in order to better diagnose CM.  
23  
24 106 NeuroCM study aims to collect data (such as blood and cerebrospinal fluid culture, fundoscopic  
25  
26 107 examination) on coma's etiologies in Beninese young children.  
27  
28 108 Without treatment, CM is invariably fatal. Even with parenteral artemisinin use, severe malaria  
29  
30 109 death rate is 20%<sup>7</sup>. In case of severe or CM, patients should be hospitalized in an intensive care  
31  
32 110 unit. Conscience status, blood pressure, heart and respiratory rates, diuresis and oxygen  
33  
34 111 saturation have to be monitored every six hours<sup>8</sup>. Parenteral artemisinin instead of quinine is  
35  
36 112 recommended at a posology of 2.4 mg/kg by injection (3 mg/kg in children under 20 kg of body  
37  
38 113 weight) at diagnosis, 12 and 24 hours later and then daily until patients can take oral drugs<sup>7</sup>.  
39  
40 114 Benzodiazepine should be used to treat convulsions (diazepam 0.3 mg/kg; midazolam or  
41  
42 115 lorazepam). It seems accepted that CM surviving patients generally don't present any  
43  
44 116 neurological sequelae and fully recover their neurological capacity. However, immediate  
45  
46 117 neurological after-effect is described in 6.7 to 11.6% of cases<sup>7,9</sup> and a recent meta-analysis  
47  
48 118 found a relation between CM and neurologic disease<sup>10</sup>. The NeuroCM study will collect data  
49  
50 119 on children's clinical recovery at discharge and 21-28 days later.  
51  
52  
53  
54  
55  
56  
57  
58  
59  
60

1  
2  
3 120 Tools for malaria control are less and less effective. On one hand, *P. falciparum* drug resistance  
4  
5 121 is a growing concern. Resistance to chloroquine, one of the main anti-malarial drugs, appeared  
6  
7 122 during the sixties in South-East Asia and then spread to Africa<sup>11,12</sup>. Artemisinin-combined  
8  
9 123 therapy became the treatment of choice for malaria with the aim to reduce the risk of parasites  
10  
11 124 developing resistance<sup>13</sup>, but resistance appeared in South-East Asia in 2008<sup>14</sup> and was  
12  
13 125 confirmed in others studies<sup>15</sup>. It has not, hitherto, spread to Africa but this is a real concern for  
14  
15 126 the WHO<sup>16</sup>. On the other hand, mosquitos become more and more resistant to insecticides,  
16  
17 127 making antivectional prevention more and more difficult<sup>17</sup>. Thus, research for new therapies is  
18  
19 128 needed.

20  
21  
22  
23 129 Pathophysiology of CM is complex and multifactorial, based on both parasite and host immune  
24  
25 130 factors. It is currently believed that CM is caused by dedicated parasite variants that specifically  
26  
27 131 localize in brain through interaction between parasite proteins expressed on the surface of the  
28  
29 132 infected erythrocytes (iE) and brain endothelium. This sequestration occurs with erythrocytes  
30  
31 133 infected with late stage of *P. falciparum* (trophozoites and schizonts). Binding of iE to  
32  
33 134 endothelial vascular cells is mediated by Variant Surface Antigens (VSA). *Plasmodium*  
34  
35 135 virulence is linked to its ability to express VSA<sup>18</sup>. VSA include three different multigenic  
36  
37 136 families: *var*, *rifin* and *stevor*. More specifically, *var* genes coding for PfEMP1 proteins are  
38  
39 137 highly polymorphic and present in sixty copies in *P. falciparum* genome. Those PfEMP1 are  
40  
41 138 expressed on iE surface and are responsible for endothelial receptors binding, such as  
42  
43 139 Chondroitin Sulfate A (CSA) and Endothelial Protein C Receptor (EPCR) or InterCellular  
44  
45 140 Adhesion Molecule (ICAM) respectively involved in placental malaria<sup>19</sup> and severe malaria<sup>20</sup>.  
46  
47 141 PfEMP1 family has been clearly associated with binding of iE to the microvascular endothelium  
48  
49 142 of every organ and tissue<sup>21</sup>. We now better understand iE's binding on placenta<sup>22</sup> and vaccine  
50  
51 143 development to prevent gestational malaria seems an achievable goal. By contrast, research is  
52  
53 144 still needed to understand which type of proteins specifically binds to cerebral endothelial  
54  
55  
56  
57  
58  
59  
60

1  
2  
3 145 receptor. In a previous study conducted in Benin, we identified several proteins associated with  
4  
5 146 CM<sup>23</sup>.

7  
8 147 The finding of a PfEMP1 variant specifically related to CM could pave the way to the  
9  
10 148 development of a vaccine targeting this specific protein. Studying the transcriptomic and  
11  
12 149 proteomic profiles of plasmodial strains involved in CM compared to strains involved in  
13  
14 150 uncomplicated malaria (UM) is a first step to better understand related mechanisms to cerebral  
15  
16 151 endothelium binding.

18  
19 152 The host immune aspect of the pathophysiology of CM are the consequences of microvascular  
20  
21 153 sequestration of iEs and rosettes (non-infected red blood cells) in brain. Such sequestration  
22  
23 154 leads to blood flow obstruction, ischemia/hypoxia and local inflammation resulting in  
24  
25 155 neuroinflammation<sup>24-28</sup>. The way this cascade of events is linked and the reasons why they result  
26  
27 156 in death or inflammation resolution remains to be elucidated. Acute cerebral ischemia is known  
28  
29 157 to drive microglia activation and influx of myeloid immune cells to the brain. Resident  
30  
31 158 microglia and infiltrating monocytes/neutrophils have a critical role in initiating, sustaining  
32  
33 159 (M1 polarization) and resolving (M2 polarization) post-ischemic inflammation<sup>29-31</sup>. Another  
34  
35 160 important immune aspect of neuroinflammation during CM is redox equilibrium. The  
36  
37 161 production of reactive oxygen species both by parasites (haemoglobin digestion) and  
38  
39 162 monocytes/macrophages are thought to cause damages to neurons<sup>32</sup>. This process leads to BBB  
40  
41 163 permeability and neurodegeneration<sup>33,34</sup>. In order to counterbalance the excess of oxidants,  
42  
43 164 oxidant scavengers and antioxidant enzymes may be produced. NO bioinsufficiency and  
44  
45 165 subsequent vasoconstriction constitute other important aspects of CM pathophysiology<sup>35</sup>. Haem  
46  
47 166 and superoxide anion release during infection leads to NO mobilization for detoxification,  
48  
49 167 depriving vascular smooth muscle cells in NO and leading to inflammation-related  
50  
51 168 vasospasm<sup>35,36</sup>. Although vasospasm has not been clearly associated to death risk during CM<sup>37</sup>,  
52  
53 169 NO pathway deserves a better understanding during CM pathophysiology. In the NeuroCM  
54  
55  
56  
57  
58  
59  
60

1  
2  
3 170 study, we intend to better understand mechanisms of neuroinflammation and its resolution in a  
4  
5 171 context of CM, by comparing data collected in children presenting with CM, in children  
6  
7 172 hospitalized for non-malarial non-traumatic coma, and in children with UM. We will focus our  
8  
9 173 studies on markers of immune cell migration and polarization (towards inflammatory or  
10  
11 174 resolutive phenotypes), of pro- or anti-oxidant response, and of pro- or anti-inflammatory  
12  
13 175 response through urine and blood samples analysis at inclusion, 3 and 21 to 28 days post-  
14  
15 176 inclusion.  
16  
17  
18  
19  
20

177

### 178 **Study objectives**

21  
22  
23 179 The main objective is to identify the causative factors of neuroinflammation in the context of  
24  
25 180 CM. There are currently very few systematic data from West Africa on the etiologies and  
26  
27 181 management of non-traumatic coma in small children, and NeuroCM will bring new  
28  
29 182 information on these aspects. We postulate that an accurate understanding of molecular and  
30  
31 183 cellular mechanisms involved in neuroinflammation may help to define efficient strategies to  
32  
33 184 prevent and manage CM.  
34  
35  
36  
37  
38  
39

185

40 186 There are three distinct objectives in this study.  
41  
42  
43

187

44 188 *I. To identify parasitological factors associated with P. falciparum CM or UM*

45  
46 189 We expect to identify and validate *P. falciparum* virulence factors associated with CM by  
47  
48 190 comparison with UM. Once proteins of interest will be found, functional studies will help to  
49  
50 191 better understand their role in CM.  
51  
52  
53

192

54  
55 193 *II. To identify immune host factors associated with fatal or favorable outcome of CM*  
56  
57  
58  
59  
60

1  
2  
3 194 We expect to better understand which mechanisms trigger neuroinflammation and its resolution  
4  
5 195 during CM by comparing three groups of children: presenting with CM, hospitalized for non-  
6  
7 196 malarial non-traumatic coma, and presenting with UM. We aim to identify therapeutic  
8  
9 197 molecular targets involved in neuroinflammation resolution.  
10  
11  
12 198

### 13 14 199 *III. To describe coma's etiology in Sub-Saharan Africa*

15  
16  
17 200 We expect to improve knowledge in non-malarial non-traumatic coma's etiologies in Sub-  
18  
19 201 Saharian Africa in order to improve young children's coma management and inform health  
20  
21 202 public policies on the role played by infections that could be prevented by vaccination.  
22  
23

24 203

## 25 26 204 **Methods and analysis**

### 27 28 205 Design

29  
30 206 This is a prospective, case-control study comparing CM to UM and non-malarial non-traumatic  
31  
32 207 coma. Patients will be recruited in South Benin, in two different hospitals for coma and in a  
33  
34 208 dispensary for UM, as UM is rarely detected in hospitals where children with coma are  
35  
36 209 managed. This study is conducted by one Beninese research team (CERPAGE, Centre d'Etude  
37  
38 210 et de Recherche sur le Paludisme Associé à la Grossesse et à l'Enfance) and three French  
39  
40 211 research teams (UMR D216 MERIT in Paris carrying the project, UMR D152 PHARMADEV  
41  
42 212 in Toulouse, UMR S1094 NET in Limoges).  
43  
44  
45  
46

47 213

### 48 49 214 Study environment

50  
51 215 This study takes place in Benin, precisely in Cotonou and Calavi for the hospital's recruitment.  
52  
53 216 UM recruitment takes place in Sô-Ava district. Cotonou is the largest city and economic centre  
54  
55 217 of Benin, with an estimated population of 679,012 habitants in 2013. In the study area,  
56  
57 218 outpatients with UM do not seek care in the health care facilities where children with coma are  
58  
59  
60

1  
2  
3 219 managed. A multi-center study for UM cases inclusion, using the main patient's origin from  
4  
5 220 the corresponding hospital, would have been more even accurate.

6  
7 221 The two recruitment hospitals are the CHU-MEL (CHU-Mère et Enfant de la Lagune) and  
8  
9 222 Hôpital de zone de Calavi. Routine laboratory analysis, except bacteriology, are performed on  
10  
11 223 site for children included with coma and at IRCB (Institut de Recherche Clinique du Bénin) for  
12  
13 224 children with UM. Bacteriological analyses are performed in the microbiology laboratory of  
14  
15 225 CNHU (Centre National Hospitalier Universitaire). Research analyses are done in the  
16  
17 226 CERPAGE laboratory.

18  
19  
20  
21  
22 227

### 23 24 228 Participants

25  
26 229 We aim to include 3 different clinical groups of 100 children between 24 and 71 months during  
27  
28 230 12 months (from December 2017 to November 2018). This duration has been determined  
29  
30 231 according to previous studies in Benin<sup>38</sup>.

31  
32  
33 232 In the **first group**, a diagnosis of CM will be defined as follows: positive *P. falciparum*  
34  
35 233 parasitaemia with a Blantyre score  $\leq 2$  with exclusion of patients presenting: positive  
36  
37 234 bacteraemia, meningitidis proved or suspected (leucocytes in cerebrospinal fluid  $> 1000$  per  
38  
39 235 microliter and/or Gram positive in LCS and/or LCS bacterial culture positive and/or PCR  
40  
41 236 positive for any bacteria or virus).

42  
43  
44 237 In the **second group**, a diagnosis of non-malarial non-traumatic coma will be defined as  
45  
46 238 follows: Blantyre score  $\leq 2$  and no *Plasmodium* infection as detected by thick blood smear.

47  
48  
49 239 In the **third group** UM will be defined as follows: 1) fever at inclusion or within 24 hours  
50  
51 240 before, 2) no clinical or biological sign of severe malaria (table 1), no danger signs and no other  
52  
53 241 obvious cause of fever and 3) *P. falciparum* parasitaemia between 1,000 to 500,000 parasites  
54  
55 242 per microliter.

56  
57  
58 243  
59  
60

### 244 Inclusion and exclusion criteria

245 For all children, the first inclusion criterion is parental acceptance that their child participate in  
246 the study after information has been given (see section “Ethics and safety considerations”).

247 Inclusion criteria for coma (CM and non-malarial non-traumatic coma) are: age between 24 to  
248 71 months, Blantyre score  $\leq 2$ , negative HIV Rapid Diagnostic Test (RDT). Non-inclusion  
249 criteria are: pre-existent neurologic disease and traumatic or toxic coma.

250 Inclusion criteria for UM are: age between 24 to 71 months, fever  $> 38^{\circ}\text{C}$  at inclusion or within  
251 24 hours before and no clinical severity/danger sign, positive malaria RDT, negative HIV RDT.

252 Exclusion criteria for coma are: thick and thin blood smear not realized at day 0 (D0) and/or  
253 biological blood test no realized at D0 and/or research blood test not realized at D0.

254 Exclusion criteria for UM are: thick and thin blood smear not realized at day 0 (D0) and/or  
255 biological blood test no realized at D0 and/or research blood test not realized at D0 and/or

256 laboratory indices for severe malaria and/or thick and thin blood smear negative for *P.*  
257 *falciparum* and/or parasite density under 1000 parasite per microliter or higher than 500,000

258 parasites per microliter. To evidence a significant difference between CM and UM groups in  
259 the ratio of endogenous mediators associated with inflammation resolution, we estimated that

260 a sample size of 100 subjects per group was sufficient to reach the main study target, i.e., by  
261 linear regression analysis involving a maximum of 6 predictors and an  $R^2$  value of 0.400,

262 ensuring an 80% power and a 5% probability of type I error. This sample size also complies  
263 with the requirements of the RT-qPCR analysis used to validate the discrimination of CM and

264 UM samples obtained by SARTools, and finally with the overall funding request of the project.

265

### 266 Recruitment process

267 *Step 1: Enrolment/screening*

1  
2  
3 268 For CM and non-malarial non-traumatic coma group, every young child with neurologic  
4  
5 269 symptoms is screened for eligibility. For UM group, every child presenting at the outpatient  
6  
7 270 clinic with fever or fever during the previous 24 hours is screened. The first step is patients'  
8  
9 271 screening to confirm study eligibility and provide participants with information about the study.  
10  
11 272 A questionnaire assessing eligibility will inform on home addresses, sociodemographic data  
12  
13 273 (number of children in the family, ethnical group...), clinical history, use of mosquito net and  
14  
15 274 vaccination status. Informed consent is then obtained from the parents or caregivers.  
16  
17 275 The following tests are performed to screen for malaria and to rule out HIV infections: a RDT  
18  
19 276 detecting HRP2 for *P. falciparum* detection and Determine HIV-1/2 set, Alere for HIV  
20  
21 277 detection.

22  
23  
24  
25  
26 278 *Step 2: Clinical examination and biological sample/analysis*

27  
28 279 A clinical examination is performed by a study physician for children hospitalized with coma,  
29  
30 280 and by a study nurse for UM. In the coma group, a fundoscopic assessment is performed  
31  
32 281 (Eyepax 1.0 Dioptrix) and pictures are captured and downloaded on an online database. The  
33  
34 282 clinical data entry is performed on an online case report form.  
35  
36 283 In order to allocate children to their respective groups, biological analyses according to severe  
37  
38 284 malaria are needed. For coma's inclusion: thick and thin blood smear analysis, complete blood  
39  
40 285 count (CBC) (Sysmex KX-21N, Sysmex XT-1800i and ABS Micro ES 60), biochemistry  
41  
42 286 analysis ( $\text{Na}^+$ ,  $\text{K}^+$ ,  $\text{Cl}^-$ ,  $\text{Ca}^{++}$ ,  $\text{HCO}_3^-$ , albumin, urea, creatinine, glucose, lactate) with Piccolo  
43  
44 287 Sysmex and ALAT plus bilirubine (Biolabo Kenza Max biochemistry and Mindray BS-200)  
45  
46 288 are performed on site. Blood culture, Gram staining and bacterial culture for CSF are realized  
47  
48 289 in a university hospital reference laboratory. Biomérieux Biofire™ FilmArray™  
49  
50 290 Meningitis/Encephalitis Panel multiplex PCR (looking for *E. coli*, *H. influenzae*, *L.*  
51  
52 291 *monocytogenes*, *N. meningitidis*, *S. agalactiae*, *S. pneumoniae*, cytomegalovirus, enterovirus,  
53  
54 292 Epstein-Barr virus, herpes simplex virus (HSV) 1, HSV2, human herpesvirus 6, paraechovirus,  
55  
56  
57  
58  
59  
60



1  
2  
3 293 varicella zona virus and *Cryptococcus neoformans* and *C. gattii*) will be further performed in  
4  
5 294 France. The required following samples are needed: one EDTA tube (2 mL) for CBC and  
6  
7  
8 295 malaria diagnostic, one heparin tube (2 mL) for biochemistry analysis, one cerebrospinal  
9  
10 296 sample (1 mL), one blood sample for blood culture (5 mL) for routine analyses, two additional  
11  
12 297 EDTA tubes (6 mL) and 50 mL of urine for research analyses.

14 298 For UM inclusions: severe malaria was ruled out according to results from blood cell count  
15  
16 299 (Sysmex XS500i), biochemistry analysis (bilirubin, glucose, creatinine) on Selectra pro  
17  
18 300 automate (Elitech group) and thick blood smear. The following samples are needed: one EDTA  
19  
20 301 tube (2 mL), one heparin tube (2 mL) and one fluorinated tube (2mL) for routine analyses, two  
21  
22 302 additional EDTA tubes (6 mL) and 50 ml of urine for research analyses.

### 26 303 *Step 3: Research analyses*

28 304 A part of research analyses is realized in Cerpage lab. One to 1.5 mL of blood is cultured in  
29  
30 305 supplemented Roswell Park Memorial Institute (RPMI) 1640 medium with Albumax (Gibco)  
31  
32 306 for less than 48 hours until parasites reach the mature stage (from young trophozoite to  
33  
34 307 schizont), then purified using magnetic-activated cell sorting (MACS; Milteny Biotec, Bergisch  
35  
36 308 Gladbach, Germany) for binding and endothelial cell activation assay. The resulting mature  
37  
38 309 stage are stored at -80°C for further mass spectrometry protein analysis. Two hundred µL of  
39  
40 310 whole blood samples are conserved at -20°C for DNA analysis, 200 µL are transferred in  
41  
42 311 TRIzol reagent (Life technologies, France) and stored at -80°C for further RNA extraction<sup>39</sup>,  
43  
44 312 and 200 µL in liquid nitrogen for parasite cryoconservation. Plasma samples are conserved at -  
45  
46 313 20°C and -80°C respectively for immune response analysis and dosage of biomarkers.  
47  
48 314 Peripheral blood mononuclear cells (PBMC) are separated from red blood cells by Ficoll  
49  
50 315 density gradient and stored in liquid nitrogen. Finally, urines are stored at -80°C for further  
51  
52 316 analysis. See table 3 for detailed research planning.

1  
2  
3 317 Parasite factors analyses will be performed in several ways. We will compare CM and UM  
4  
5 318 isolates with whole genome DNA sequencing; RNA-sequencing and by quantitative MS  
6  
7 319 analysis. Highly polymorphic *var* genes will be assembled and BLASTed against peptide hits  
8  
9 320 from the MS approach. Nucleotide primers will be designed with DNA-sequencing data and  
10  
11 321 used in RT-qPCR to validate the RNA-seq data. Associations between gene polymorphisms  
12  
13 322 and modifications in RNA nature and quantity detected by RNA-seq will be investigated. Then,  
14  
15 323 we will use recombinant protein and *P. falciparum* genome modification by gene disruption to  
16  
17 324 study proteins' role.

18  
19 325 Host factors study will be based on the analysis of PBMC, plasmas and urine samples of the  
20  
21 326 three groups of children. PBMC analysis will focus on the phenotyping of monocytes to  
22  
23 327 distinguish M1 and M2-like phenotypes. Flow cytometry will be used to measure expression  
24  
25 328 levels of CD11b and CD16 as M1 markers, and CD163 and CD206 as M2 markers. The  
26  
27 329 assessment of gene expression levels of cytokines, chemokines and their receptors by RT-qPCR  
28  
29 330 will complete phenotype analysis. Plasmas and urine samples will allow to measure redox (L-  
30  
31 331 arginine and biopterins), pro-/anti-inflammatory (cytokines, chemokines and lipid mediators  
32  
33 332 such as eicosanoids) and pro-resolving mediators (such as prostaglandins and lipoxins) by  
34  
35 333 ELISA or EIA. We will first compare data from the group of CM to the two other groups in  
36  
37 334 order to identify the biological markers best related to inflammation and neurological  
38  
39 335 impairment during CM. Second, we will analyze data obtained with the two coma groups at  
40  
41 336 inclusion (Day 0), at Day 3 and Day 30 to understand the kinetics of immune events and its  
42  
43 337 relation to death or favorable outcome. Finally, we will search for severity and death risk factors  
44  
45 338 within the CM groups.

#### 339 *Step 4: Coma follow-up*

340 In children presenting with coma, both clinical data and blood samples are collected at day 3  
341 (D3) and day 21-28 (D21-28) on disease outcome, and for research purpose. One EDTA tube

1  
2  
3 342 (6 mL) and 50 mL urine will be sampled. In order to prevent losses, parents/guardians are called  
4  
5 343 a few days before D21-28 to remind them of follow-up visit. No follow-up visit is scheduled  
6  
7 344 for children with UM.  
8  
9

10 345

### 11 12 346 Data management

13  
14 347 Data, including clinical, biological and research results are collected and managed using CS  
15  
16 348 online-Ennov clinical (<https://ufrcb.chu-limoges.fr/crfonline/>). It is a secure, web-based  
17  
18 349 application designed to support data capture for research studies. Study participants are  
19  
20 350 identified by a code and have their own account. The two physicians and the nurse were trained  
21  
22 351 to entry the data on included children in the database. Nobody can delete a patient created in  
23  
24 352 the base, except the Data manager.  
25  
26  
27

28 353 Data & Safety Monitoring Board (DSMB), composed by two physicians specialized in  
29  
30 354 infectious disease and one statistician, will review allocation of children to the pre-defined study  
31  
32 355 groups and discuss possible deviations from the expected number of subjects in the groups.  
33  
34  
35

36 356

### 37 357 Data analysis

38  
39 358 In a first step, descriptive statistics will be realized by calculating mean and standard deviation  
40  
41 359 (sd) for quantitative variables, and proportion for qualitative variables to determine the main  
42  
43 360 characteristics of the three clinical groups.  
44  
45

46 361 Focusing on cerebral and UM children the MS/MS data will be searched against the databases  
47  
48 362 (UNIPROT and PlasmoDB<sup>40</sup>), the proteins will be considered as positive hits with at least two  
49  
50 363 peptides. The MaxQuant software will be used to compare malaria protein expression between  
51  
52 364 isolates of these two clinical groups. Transcriptomic data will be analyzed with Galaxy  
53  
54 365 (<https://usegalaxy.org/>) and R software (<https://www.r-project.org/>)<sup>41</sup>. The raw data will be  
55  
56 366 trimmed with Trimmomatic tool for Phred Quality Score Qscore >20, read length >30 bases,  
57  
58  
59  
60

1  
2  
3 367 and ribosome sequences will be removed with tool sortMeRNA. Reads will be mapped against  
4  
5 368 the *P. falciparum* 3D7 reference genome combined with *var* transcript sequences from 7 *P.*  
6  
7 369 *falciparum* genomes. Differential expression analysis on RNAseq data will be performed using  
8  
9 370 the DESeq2<sup>42</sup> package considering a 1 log-fold increase as significant using adjusted *p* value <  
10  
11 371 0.05. Data normalization will be realized with DESeq2 software, with hypothesis that there  
12  
13 372 exists genes overexpressed and underexpressed and that majority of genes are not expressed in  
14  
15 373 a differential way. Transcript expression levels (evaluated with RT-qPCR) will be compared by  
16  
17 374 T-tests and ANOVA of transformed outcomes.

18  
19 375 Regarding immune response analysis, potential markers related to inflammation and  
20  
21 376 neurological symptoms will be compared using variance analysis in samples from children from  
22  
23 377 the three groups, CM, UM and non-malarial non-traumatic group. The groups will be compared  
24  
25 378 two by two with a linear regression, with a special attention to CM/UM comparison. Adjustment  
26  
27 379 variables such as age, sex, ethnical group, time to hospital transfer, body temperature, and co-  
28  
29 380 morbidities will be taken into account in the model. It will be further determined if a global  
30  
31 381 comparison between the three groups will be made. Generally speaking, the non-malarial non-  
32  
33 382 traumatic coma group will be used as a comparator to analyze specific effect of malaria in  
34  
35 383 neuroinflammation development. The second major question to be answered to is, within the  
36  
37 384 CM group, whether the changes of the inflammation markers between D0 (admission) and D3  
38  
39 385 are predictive of the outcome (survival/death). A logistic model (univariate then multivariate)  
40  
41 386 will be used for this analysis. The same adjustment variables will be used as in the comparison  
42  
43 387 between groups. The dependent variable will be the outcome survival/death.

44  
45 388 The last model (also a logistic regression) will study the changes in inflammation markers  
46  
47 389 between D3 and D21 in the survivors in order to determine if they are predictive of a favorable  
48  
49 390 evolution. The dependent variable will be the outcome, here the discharge from the hospital  
50  
51 391 without apparent sequelae.

392 Missing data are not expected to affect more than 10% of the records for the main factors that  
393 will be analyzed. Should they be over 5%, an imputation method such as the MICE method will  
394 be applied, as the errors can be considered at random<sup>43</sup>.

395

### 396 Patient and public involvement

397 From patients' experience and preference, follow-up of children admitted with coma was  
398 scheduled in order to be able to detect neurological sequelae. The diagnostic workup proposed  
399 to all children included into the study, although not affordable to all patients in routine practice,  
400 met parent's expectations on what health facilities should provide to all patients. All patients  
401 were recruited in health facilities where they usually seek care, and to that respect patients were  
402 involved in their recruitment process. Finally, results will not be disseminated directly to study  
403 participants but through peer-reviewed scientific journal and conference presentations.

404

### 405 **Ethics and dissemination**

#### 406 Ethics and safety considerations

407 Ethics approval for the NeuroCM study has been obtained from *Comité National d'Ethique*  
408 *pour la Recherche en santé* of Benin (n°67/MS/DC/SGM/DRFMT/CNERS/SA; 10/17/2017).  
409 NeuroCM study has also been approved by the *Comité consultatif de déontologie et d'éthique*  
410 of Institut de Recherche pour le Développement (IRD; 10/24/2017).

411 Parents/guardians will be given an oral information by the physician or the nurse and an  
412 opportunity to ask question and refuse the protocol. Patient's confidentiality will be ensured  
413 and anonymity guaranteed by anonymous coding given at the inclusion.

414

#### 415 Dissemination

1  
2  
3 416 The main benefits of NeuroCM are targeted on people living in malaria endemic countries. The  
4  
5 417 study results will be disseminated through a variety of instruments to ensure that a broad range  
6  
7 418 of both specialists and non-specialists are informed and can properly benefit from the findings.  
8  
9 419 First, through the direct consultations with the WHO's TDR-MIM, Roll Back Malaria program  
10  
11 420 to reach the wider public health audience; through scientific meetings and peer-reviewed  
12  
13 421 publications in scientific or medical journals to reach the scientific/medical/public health  
14  
15 422 communities; through guidelines targeting the medical and paramedical staff for optimization  
16  
17 423 of severe malaria management, through booklets (e.g. first aid procedures and adapted behavior  
18  
19 424 in case of emergency) elaborated and adapted to the population of Benin.  
20  
21  
22  
23  
24  
25

## 26 426 **Discussion**

27  
28 427 CM is the most life-threatening form of malaria with high mortality rate in young children.  
29  
30 428 Mortality related to malaria is still high in children population and accurate CM diagnosis  
31  
32 429 remains challenging. Among CM surviving children, up to 25% have long-term neuro-cognitive  
33  
34 430 deficits (visual/hearing/cognitive/language impairment/ataxia/hemiparesis/motor deficit...),  
35  
36 431 and 10% show evidence of mental health disorders<sup>44</sup>. As CM might be one of the more common  
37  
38 432 causes of epilepsy in malaria-endemic regions, the burden of CM neurological sequelae may be  
39  
40 433 largely underestimated, but difficult to estimate because diagnosis is challenging in malaria-  
41  
42 434 endemic regions. Bacterial or viral central nervous system infections may occur in children with  
43  
44 435 malarial infection; this may not only originate overdiagnosis of CM, but also may overlook  
45  
46 436 potential bacterial and viral central nervous system infections.

47  
48  
49  
50  
51 437 The expected impact of NeuroCM is of great magnitude. First, NeuroCM is an attempt to  
52  
53 438 propose improvements for the diagnosis of CM. It will provide as far as possible, for the first  
54  
55 439 time in West Africa, an identification of the causes of coma in the study area. Second, thanks  
56  
57 440 to DNA, RNA and protein analyses, NeuroCM will allow to identify new parasite targets for a  
58  
59  
60

1  
2  
3 441 vaccine to prevent CM. Third, NeuroCM will provide data on the kinetics of appearance of  
4  
5 442 inflammatory and pro-resolving molecular and cellular events in brain during CM. The role of  
6  
7 443 endogenous mediators in neuroinflammation resolution during CM will be clarified, with  
8  
9 444 emphasis on pro-oxidant components and lipid mediators. NeuroCM will also identify markers  
10  
11 445 allowing the definition of an immunological state in the process of neuroinflammation  
12  
13 446 resolution in CM patients. Our experimental murine model will allow the formulation of new  
14  
15 447 hypothesis while proof of concept will be achieved through the correlation of our proposed  
16  
17 448 targets with patient morbidity and mortality parameters. In the future, it may allow clinicians to  
18  
19 449 better manage CM, with specific pro-resolving drugs for instance.  
20  
21  
22

23  
24 450 The final products of NeuroCM are expected to feed the pipeline of new therapeutic (immune  
25  
26 451 intervention) and preventive (vaccine) strategies to improve CM outcome, as well as other  
27  
28 452 diseases involving neuroinflammation.  
29  
30

31 453

### 32 33 454 **Authors contributions**

34  
35 455 VJ and JFF drafted the manuscript. GB, AA, SH, DA, NA, MC, PD and JFF revised the  
36  
37 456 manuscript. GB, AA, FB, SH, DA, NA, MC, PD and JFF designed the study. VJ and LM  
38  
39 457 organized the study in the field. AM, IDD and JA implemented the study in the field. All  
40  
41 458 members of the NeuroCM group have substantially contributed to the conception, design or  
42  
43 459 organization of the study. All authors approved the final version to be submitted to the journal.  
44  
45  
46

47 460

### 48 49 461 **Collaborators**

50  
51 462 NeuroCM group: Dissou Affolabi, H el ene Authier, Linda Ayedadjou, Bibiane Biokou, Agn es  
52  
53 463 Coste, Jean-Eudes Degbelo, Latifou Dramane, Sayeh Jafari-Guemouri, Claire Kamaliddin,  
54  
55 464 Elis e Kinkpe, Ana ıs Labrunie, Y el e Ladipo, Thomas Lathiere, Audrey Mowendabeka, Jade  
56  
57  
58  
59  
60

1  
2  
3 465 Papin, Bernard Pippy, Pierre-Marie Preux, Marie Raymondeau, Jade Royo, Darius Sossou,  
4  
5 466 Brigitte Techer, Bertin Vianou.  
6  
7

8 467

9  
10 468 **Funding**

11  
12 469 This work was supported by the French Agence Nationale de la Recherche, under contract  
13  
14 470 ANR-17-CEI 7-0001-01.  
15

16  
17 471

18  
19 472 **Competing interests**

20  
21 473 No competing interest.  
22  
23

24 474

25  
26 475 **Word Count**

27  
28 476 4,536 words  
29  
30

31 477

32  
33 478 **References**

34  
35 479 1. World Health Organization. World malaria report 2018. Available at:  
36  
37 480 <https://www.who.int/malaria/publications/world-malaria-report-2018/en/>  
38

39  
40 481 2. Black RE, Cousens S, Johnson HL, *et al*. Global, regional, and national causes of child  
41  
42 482 mortality in 2008: a systematic analysis. *Lancet* 2010;375:1969–87.  
43

44  
45 483 3. Beninese health department. Annuaire des statistiques sanitaires 2016. Available at:  
46  
47 484 [http://www2.sante.gouv.bj/IMG/pdf/annuaire\\_stat\\_pas\\_2016.pdf](http://www2.sante.gouv.bj/IMG/pdf/annuaire_stat_pas_2016.pdf)  
48

49  
50 485 4. World Health Organization. Stratégie de coopération de l'OMS avec le Bénin: 2016-  
51  
52 486 2019. Available at: <http://apps.who.int/iris/handle/10665/246191>  
53

54 487 5. Mallewa M, Vallely P, Faragher B, *et al*. Viral CNS infections in children from a  
55  
56 488 malaria-endemic area of Malawi: a prospective cohort study. *Lancet Glob Health*. 2013;1:e153-  
57  
58 489 160.  
59  
60



- 1  
2  
3 490 6. Beare NAV, Taylor TE, Harding SP, *et al.* Malarial retinopathy: a newly established  
4  
5 491 diagnostic sign in severe malaria. *Am J Trop Med Hyg* 2006;75:790–7.  
6  
7 492 7. Dondorp AM, Fanello CI, Hendriksen ICE, *et al.* Artesunate versus quinine in the  
8  
9 493 treatment of severe falciparum malaria in African children (AQUAMAT): an open-label,  
10  
11 494 randomised trial. *Lancet Lancet* 2010;376:1647–57.  
12  
13  
14 495 8. World Health Organization. La prise en charge du paludisme grave - guide pratique.  
15  
16 Troisième édition. Available at:  
17 496 <http://www.who.int/malaria/publications/atoz/9789241548526/fr/>  
18  
19 497  
20  
21 498 9. Severe malaria. *Trop Med Int Health TM IH.* 2014;19 Suppl 1:7–131.  
22  
23  
24 499 10. Christensen SS, Eslick GD. Cerebral malaria as a risk factor for the development of  
25  
26 500 epilepsy and other long-term neurological conditions: a meta-analysis. *Trans R Soc Trop Med*  
27  
28 501 *Hyg*;109:233–8.  
29  
30  
31 502 11. Wernsdorfer WH. The development and spread of drug-resistant malaria. *Parasitol*  
32  
33 503 *Today* 1991;7:297–303.  
34  
35 504 12. Mengesha T, Makonnen E. Comparative efficacy and safety of chloroquine and  
36  
37 505 alternative antimalarial drugs: a meta-analysis from six African countries. *East Afr Med J*  
38  
39 506 1999;76:314–9.  
40  
41  
42 507 13. World Health Organization. WHO calls for an immediate halt to provision of single-  
43  
44 508 drug artemisinin malaria pills. Available at:  
45  
46 509 <http://www.who.int/mediacentre/news/releases/2006/pr02/en/>  
47  
48  
49 510 14. Noedl H, Se Y, Schaecher K, *et al.* Evidence of artemisinin-resistant malaria in western  
50  
51 511 Cambodia. *N Engl J Med* 2008;359:2619–20.  
52  
53  
54 512 15. Dondorp AM, Nosten F, Yi P, *et al.* Artemisinin resistance in *Plasmodium falciparum*  
55  
56 513 malaria. *N Engl J Med* 2009;361:455–67.  
57  
58 514 16. World Health Organization. Status report on artemisinin resistance and ACT efficacy.  
59  
60

- 1  
2  
3 515 Available at: [http://www.who.int/malaria/publications/atoz/artemisinin-resistance-](http://www.who.int/malaria/publications/atoz/artemisinin-resistance-august2018/en/)  
4  
5 516 [august2018/en/](http://www.who.int/malaria/publications/atoz/artemisinin-resistance-august2018/en/)  
6  
7  
8 517 17. World Health Organization. Global report on insecticide resistance in malaria vectors:  
9  
10 518 2010-2016. Available at: <http://www.who.int/malaria/publications/atoz/9789241514057/en/>  
11  
12 519 18. Kraemer SM, Smith JD. A family affair: var genes, PfEMP1 binding, and malaria  
13  
14 520 disease. *Curr Opin Microbiol* 2006;9:374–80.  
15  
16  
17 521 19. Tuikue Ndam NG, Salanti A, Bertin G, *et al.* High level of var2csa transcription by  
18  
19 522 *Plasmodium falciparum* isolated from the placenta. *J Infect Dis* 2005;192:331–5.  
20  
21 523 20. Moussiliou A, Alao MJ, Denoed-Ndam L, *et al.* High plasma levels of soluble  
22  
23 524 endothelial protein C receptor are associated with increased mortality among children with  
24  
25 525 cerebral malaria in Benin. *J Infect Dis* 2015;211:1484–8.  
26  
27  
28 526 21. Miller LH, Baruch DI, Marsh K, *et al.* The pathogenic basis of malaria. *Nature*  
29  
30 527 2002;415:673–9.  
31  
32  
33 528 22. Tuikue Ndam N, Deloron P. Towards a vaccine against pregnancy-associated malaria.  
34  
35 529 *Parasite* 2008;15:515–21.  
36  
37  
38 530 23. Bertin GI, Sabbagh A, Argy N, *et al.* Proteomic analysis of *Plasmodium falciparum*  
39  
40 531 parasites from patients with cerebral and UM. *Sci Rep.* 2016;6:26773.  
41  
42 532 24. White NJ, Turner GDH, Day NPJ, *et al.* Lethal malaria: Marchiafava and Bignami were  
43  
44 533 right. *J Infect Dis* 2013;208:192–8.  
45  
46  
47 534 25. Berendt AR, Tumer GD, Newbold CI. CM: the sequestration hypothesis. *Parasitol*  
48  
49 535 *Today* 1994;10:412–4.  
50  
51 536 26. Clark IA, Cowden WB, Rockett KA. The pathogenesis of human cerebral malaria.  
52  
53 537 *Parasitol Today* 1994;10:417–8.  
54  
55  
56 538 27. Beare NAV, Harding SP, Taylor TE, *et al.* Perfusion abnormalities in children with  
57  
58 539 cerebral malaria and malarial retinopathy. *J Infect Dis* 2009;199:263–71.  
59  
60

- 1  
2  
3 540 28. Dorovini-Zis K, Schmidt K, Huynh H, *et al.* The neuropathology of fatal cerebral  
4  
5 541 malaria in malawian children. *Am J Pathol* 2011;178:2146–58.  
6  
7 542 29. McDonough A, Weinstein JR. Neuroimmune Response in Ischemic Preconditioning.  
8  
9 543 *Neurother J Am Soc Exp Neurother* 2016;13:748–61.  
10  
11  
12 544 30. Kim E, Cho S. Microglia and Monocyte-Derived Macrophages in Stroke. *Neurother J*  
13  
14 545 *Am Soc Exp Neurother* 2016;13:702–18.  
15  
16  
17 546 31. Xia C-Y, Zhang S, Gao Y, *et al.* Selective modulation of microglia polarization to M2  
18  
19 547 phenotype for stroke treatment. *Int Immunopharmacol* 2015 Apr;25:377–82.  
20  
21  
22 548 32. Kumar A, Barrett JP, Alvarez-Croda D-M, *et al.* NOX2 drives M1-like  
23  
24 549 microglial/macrophage activation and neurodegeneration following experimental traumatic  
25  
26 550 brain injury. *Brain Behav Immun* 2016;58:291–309.  
27  
28  
29 551 33. Pino P, Taoufiq Z, Nitchou J, *et al.* Blood-brain barrier breakdown during cerebral  
30  
31 552 malaria: suicide or murder? *Thromb Haemost* 2005;94:336–40.  
32  
33  
34 553 34. Postma NS, Mommers EC, Eling WM, *et al.* Oxidative stress in malaria; implications  
35  
36 554 for prevention and therapy. *Pharm World Sci PWS* 1996;18:121–9.  
37  
38 555 35. Eisenhut M. The evidence for a role of vasospasm in the pathogenesis of cerebral  
39  
40 556 malaria. *Malar J*;14:405.  
41  
42  
43 557 36. Eisenhut M. Vasospasm in cerebral inflammation. *Int J Inflamm* 2014;2014:509707.  
44  
45 558 37. O’Brien NF, Mutatshi Taty T, Moore-Clingenpeel M, *et al.* Transcranial Doppler  
46  
47 559 Ultrasonography Provides Insights into Neurovascular Changes in Children with cerebral  
48  
49 560 malaria. *J Pediatr* 2018;203:116-124.e3.  
50  
51  
52 561 38. Bertin GI, Lavstsen T, Guillonneau F, *et al.* Expression of the domain cassette 8  
53  
54 562 *Plasmodium falciparum* erythrocyte membrane protein 1 is associated with cerebral malaria in  
55  
56 563 Benin. *PloS One* 2013;8:e68368.  
57  
58  
59 564 39. Ponts N, Chung D-WD, Le Roch KG. Strand-specific RNA-seq applied to malaria  
60

- 1  
2  
3 565 samples. *Methods Mol Biol Clifton NJ* 2012;883:59–73.  
4  
5 566 40. Bertin GI, Sabbagh A, Guillonneau F, *et al.* Differential protein expression profiles  
6  
7 567 between *Plasmodium falciparum* parasites isolated from subjects presenting with pregnancy-  
8  
9 568 associated malaria and uncomplicated malaria in Benin. *J Infect Dis* 2013;208:1987–97.  
10  
11 569 41. Otto TD, Wilinski D, Assefa S, *et al.* New insights into the blood-stage transcriptome  
12  
13 570 of *Plasmodium falciparum* using RNA-Seq. *Mol Microbiol* 2010;76:12–24.  
14  
15 571 42. Varet H, Brillet-Guéguen L, Coppée J-Y, *et al.* A DESeq2- and EdgeR-Based R Pipeline  
16  
17 572 for Comprehensive Differential Analysis of RNA-Seq Data. *PloS One* 2016;11:e0157022.  
18  
19 573 43. van Buuren S, Boshuizen HC, Knook DL. Multiple imputation of missing blood  
20  
21 574 pressure covariates in survival analysis. *Stat Med* 1999;18:681–94.  
22  
23 575 44. Idro R, Kakooza-Mwesige A, Asea B, *et al.* Cerebral malaria is associated with long-  
24  
25 576 term mental health disorders: a cross sectional survey of a long-term cohort. *Malar J*  
26  
27 577 2016;15:184.  
28  
29  
30  
31  
32  
33 578  
34  
35  
36  
37  
38  
39  
40  
41  
42  
43  
44  
45  
46  
47  
48  
49  
50  
51  
52  
53  
54  
55  
56  
57  
58  
59  
60

| Clinical manifestations                                   | Prognosis value | Frequency in children |
|-----------------------------------------------------------|-----------------|-----------------------|
| Impaired consciousness                                    | +++             | +++                   |
| Respiratory distress                                      | +++             | +++                   |
| Multiple convulsions                                      | +               | +++                   |
| Prostration                                               | +               | +++                   |
| Shock                                                     | +++             | +                     |
| Pulmonary oedema (radiology)                              | +++             | +/-                   |
| Abnormal bleeding                                         | +++             | +/-                   |
| Jaundice                                                  | ++              | +                     |
| Laboratory indices                                        | Prognosis value | Frequency             |
| Severe anemia (hemoglobin < 5g/dL<br>or hematocrit < 15%) | +               | +++                   |
| Hypoglycaemia (< 40 mg/dL)                                | +++             | +++                   |
| Acidosis (bicarbonate < 15 mM)                            | +++             | +++                   |
| Hyperlactemia (lactates > 5 mM)                           | +++             | +++                   |
| Renal impairment (creatinin > 3<br>mg/dL)                 | ++              | +                     |
| Hyperparasitemia (parasitaemia ><br>10%)                  | +/-             | ++                    |

579 Table 1 – Clinical and laboratory criteria for severe malaria (from (4))

580

581

|                                 | Score      |
|---------------------------------|------------|
| <b>Best motor response</b>      |            |
| Localises painful stimulus      | 2          |
| Withdraws limb from pain        | 1          |
| Non-specific or absent response | 0          |
| <b>Verbal response</b>          |            |
| Appropriate cry                 | 2          |
| Moan or inappropriate cry       | 1          |
| None                            | 0          |
| <b>Eye movement</b>             |            |
| Directed                        | 1          |
| Not directed                    | 0          |
| <b>Total</b>                    | <b>0-5</b> |

582 Table 2 – Blantyre score (from (4))

583

| Task                                                                  | Calendar |      |    |    |    |      |    |    |    |      |    |    |
|-----------------------------------------------------------------------|----------|------|----|----|----|------|----|----|----|------|----|----|
|                                                                       | 2017     | 2018 |    |    |    | 2019 |    |    |    | 2020 |    |    |
|                                                                       | T4       | T1   | T2 | T3 | T4 | T1   | T2 | T3 | T4 | T1   | T2 | T3 |
| <b>Cohort recruitment and follow-up</b>                               |          |      |    |    |    |      |    |    |    |      |    |    |
| Area preparation                                                      | ■        | ■    |    |    |    |      |    |    |    |      |    |    |
| Inclusion                                                             |          | ■    | ■  | ■  | ■  | ■    | ■  | ■  | ■  |      |    |    |
| Follow-up                                                             |          | ■    | ■  | ■  | ■  | ■    | ■  | ■  | ■  |      |    |    |
| Biological samples organization                                       |          | ■    | ■  | ■  | ■  | ■    | ■  | ■  | ■  |      |    |    |
| <b>Parasite factors</b>                                               |          |      |    |    |    |      |    |    |    |      |    |    |
| Parasite whole genome sequencing                                      |          |      |    |    | ■  | ■    | ■  | ■  | ■  |      |    |    |
| Parasite RNA-Sequencing                                               |          |      |    |    | ■  | ■    | ■  | ■  | ■  |      |    |    |
| Mass spectrometry analysis                                            |          |      |    |    |    |      | ■  | ■  | ■  | ■    |    |    |
| Identified protein validation                                         |          |      |    |    |    |      |    |    |    | ■    | ■  | ■  |
| Protein's role on endothelium activation                              | ■        | ■    | ■  | ■  | ■  |      |    |    |    | ■    | ■  | ■  |
| <b>Host factors</b>                                                   |          |      |    |    |    |      |    |    |    |      |    |    |
| Macrophage M2 kinetics apparition in mice brain                       | ■        | ■    | ■  | ■  | ■  | ■    |    |    |    |      |    |    |
| Endogenous mediator role in neuroinflammation                         |          |      |    |    | ■  | ■    | ■  | ■  | ■  |      |    |    |
| Neuroinflammation markers identification in cerebral malaria patients |          |      |    |    |    |      |    |    |    | ■    | ■  | ■  |
| <b>Results exploitation</b>                                           |          |      |    |    |    |      |    |    |    |      |    |    |
| Database validation                                                   | ■        | ■    | ■  | ■  | ■  | ■    | ■  | ■  | ■  | ■    | ■  | ■  |
| Data analysis                                                         |          |      |    |    |    |      |    | ■  | ■  |      | ■  | ■  |
| Dissemination                                                         |          |      |    |    |    |      |    |    |    |      |    | ■  |

584 Table 3 - Detailed research planning

# BMJ Open

## Identification of *Plasmodium falciparum* and host factors associated with cerebral malaria. Description of the protocol for a prospective, case-control study in Benin (NeuroCM)

|                                 |                                                                                                                                                                                                                                                                                                                                                                                                                                                                                                                                                                                                                                                                                                                                                                                                            |
|---------------------------------|------------------------------------------------------------------------------------------------------------------------------------------------------------------------------------------------------------------------------------------------------------------------------------------------------------------------------------------------------------------------------------------------------------------------------------------------------------------------------------------------------------------------------------------------------------------------------------------------------------------------------------------------------------------------------------------------------------------------------------------------------------------------------------------------------------|
| Journal:                        | <i>BMJ Open</i>                                                                                                                                                                                                                                                                                                                                                                                                                                                                                                                                                                                                                                                                                                                                                                                            |
| Manuscript ID                   | bmjopen-2018-027378.R2                                                                                                                                                                                                                                                                                                                                                                                                                                                                                                                                                                                                                                                                                                                                                                                     |
| Article Type:                   | Protocol                                                                                                                                                                                                                                                                                                                                                                                                                                                                                                                                                                                                                                                                                                                                                                                                   |
| Date Submitted by the Author:   | 08-Apr-2019                                                                                                                                                                                                                                                                                                                                                                                                                                                                                                                                                                                                                                                                                                                                                                                                |
| Complete List of Authors:       | Joste, Valentin; MERIT, IRD<br>Maurice, Laurine; MERIT, IRD; PHARMADEV, IRD<br>Bertin, Gwladys; MERIT, IRD<br>Aubouy, Agnès; PHARMADEV, IRD<br>Boumédiène, Farid; INSERM UMR 1094, Tropical Neuroepidemiology<br>Houzé, Sandrine; MERIT, IRD; Hopital Bichat - Claude-Bernard, Parasitology laboratory<br>Daniel Ajzenberg , Daniel Ajzenberg ; Inserm UMR 1094, Tropical Neuroepidemiology<br>Argy, Nicolas; MERIT, IRD; Hopital Bichat - Claude-Bernard, Parasitology laboratory<br>Massougbodji, Achille; Institut de Recherche Clinique du Bénin<br>Dossou-Dagba, Ida; Calavi Hospital, Pediatric department<br>Alao, Jules; CHU-MEL Hospital, Pediatric department<br>Cot, Michel; MERIT, IRD<br>Deloron, Philippe; MERIT, IRD<br>Faucher, Jean-François; Inserm UMR 1094, Tropical Neuroepidemiology |
| <b>Primary Subject Heading</b>: | Infectious diseases                                                                                                                                                                                                                                                                                                                                                                                                                                                                                                                                                                                                                                                                                                                                                                                        |
| Secondary Subject Heading:      | Paediatrics, Neurology                                                                                                                                                                                                                                                                                                                                                                                                                                                                                                                                                                                                                                                                                                                                                                                     |
| Keywords:                       | Paediatric neurology < NEUROLOGY, Paediatric infectious disease & immunisation < PAEDIATRICS, TROPICAL MEDICINE, PARASITOLOGY                                                                                                                                                                                                                                                                                                                                                                                                                                                                                                                                                                                                                                                                              |
|                                 |                                                                                                                                                                                                                                                                                                                                                                                                                                                                                                                                                                                                                                                                                                                                                                                                            |

SCHOLARONE™  
Manuscripts



1  
2  
3 1 Identification of *Plasmodium falciparum* and host factors associated with cerebral  
4  
5 2 malaria. Description of the protocol for a prospective, case-control study in Benin (NeuroCM)  
6  
7  
8 3

9  
10 4 Valentin Joste<sup>1</sup>, Laurine Maurice<sup>1,2</sup>, Gwladys I. Bertin<sup>1</sup>, Agnès Aubouy<sup>2</sup>, Farid Boumédiène<sup>3</sup>,  
11  
12 5 Sandrine Houzé<sup>1,4,9</sup>, Daniel Ajzenberg<sup>3</sup>, Nicolas Argy<sup>1,4,9</sup>, Achille Massougbodji<sup>5</sup>, Ida Dossou-  
13  
14 6 Dagba<sup>6</sup>, Jules Alao<sup>7</sup>, Michel Cot<sup>1</sup>, Philippe Deloron<sup>1</sup> on behalf of the NeuroCM group, Jean  
15  
16 7 François Faucher<sup>3,8</sup>  
17  
18  
19 8

20  
21 9 <sup>1</sup>. MERIT, IRD, Université Paris 5, Sorbonne Paris Cité, Paris, 75006, France  
22

23  
24 10 <sup>2</sup>. PHARMADEV, IRD, Université Paul Sabatier Toulouse III, Toulouse, France  
25

26  
27 11 <sup>3</sup>. NET, INSERM, Université de Limoges, Limoges, France  
28

29  
30 12 <sup>4</sup>. Laboratoire de Parasitologie-Mycologie, AP-HP, Hôpital Bichat, Paris  
31

32  
33 13 <sup>5</sup>. Institut de Recherche Clinique du Bénin (IRCB), Calavi, Benin  
34

35  
36 14 <sup>6</sup>. Pediatric Department, Calavi Hospital, Calavi, Benin  
37

38  
39 15 <sup>7</sup>. Pediatric Department, Mother and Child University and Hospital Center (CHUMEL),  
40  
41 16 Cotonou, Benin.

42  
43 17 <sup>8</sup>. Department of Infectious Diseases, Limoges University Hospital, Limoges, France  
44

45  
46 18 <sup>9</sup>. National French Malaria Reference Center, Bichat-Claude Bernard hospital, Paris  
47

48  
49 20 **NeuroCM group:** Dissou Affolabi<sup>6</sup>, Hélène Authier<sup>2</sup>, Linda Ayedadjou<sup>4</sup>, Bibiane Biokou<sup>7</sup>,  
50  
51 21 Agnès Coste<sup>2</sup>, Jean-Eudes Degbelo<sup>5</sup>, Latifou Dramane<sup>4</sup>, Sayeh Jafari-Guemouri<sup>1</sup>, Claire  
52  
53 22 Kamaliddin<sup>1</sup>, Elisée Kinkpe<sup>4</sup>, Anaïs Labrunie<sup>3</sup>, Yélé Ladipo<sup>7</sup>, Thomas Lathiere<sup>3</sup>, Audrey  
54  
55 23 Mowendabeka<sup>3</sup>, Jade Papin<sup>1</sup>, Bernard Pipy<sup>2</sup>, Pierre-Marie Preux<sup>3</sup>, Marie Raymondeau<sup>3</sup>, Jade  
56  
57 24 Royo<sup>2</sup>, Darius Sossou<sup>4</sup>, Brigitte Techer<sup>1</sup>, Bertin Vianou<sup>4</sup>.

58  
59 25  
60

1  
2  
3 26 **Corresponding author:**  
4

5 27 Joste Valentin, MERIT, IRD, Université Paris 5, Sorbonne Paris Cité, Paris, 75006, France

6  
7 28 Phone: +33617435543

8  
9 29 Email: valentinjoste@gmail.com  
10  
11  
12  
13  
14

15 31 **Abstract**

16  
17 32 **Introduction:** In 2016, an estimated 216 million cases and 445,000 deaths of malaria occurred  
18  
19 33 worldwide, in 91 countries. In Benin, malaria causes 26.8% of consultation and hospitalization  
20  
21 34 motif in the general population and 20.9% in children under five years old.

22  
23  
24 35 The goal of the NeuroCM project is to identify the causative factors of neuroinflammation in  
25  
26 36 the context of cerebral malaria. There are currently very few systematic data from West Africa  
27  
28 37 on the etiologies and management of non-malarial non-traumatic coma in small children, and  
29  
30 38 NeuroCM will help to fill this gap. We postulate that an accurate understanding of molecular  
31  
32 39 and cellular mechanisms involved in neuroinflammation may help to define efficient strategies  
33  
34 40 to prevent and manage cerebral malaria.

35  
36  
37 41 **Methods and analysis:** This is a prospective, case-control study comparing cerebral malaria to  
38  
39 42 uncomplicated malaria and non-malarial non traumatic coma. This study takes place in Benin,  
40  
41 43 precisely in Cotonou for children with coma and in Sô-Ava district for children with  
42  
43 44 uncomplicated malaria. We aim to include 300 children aged between 24 and 71 months and  
44  
45 46 divided in three different clinical groups during 12 months (from December 2017 to November  
46  
47 47 2018) with a 21-28 days follow-up for coma. Study data, including clinical, biological and  
48  
49 48 research results will be collected and managed using CS online-Ennov clinical.  
50  
51 49

52  
53 48 **Ethics and dissemination:** Ethics approval for the NeuroCM study has been obtained from  
54  
55 49 *Comité National d’Ethique pour la Recherche en santé* of Benin  
56  
57 50 (n°67/MS/DC/SGM/DRFMT/CNERS/SA; 10/17/2017). NeuroCM study has also been  
58  
59  
60

1  
2  
3 51 approved by *Comité consultatif de déontologie et d'éthique* of Institut de Recherche pour le  
4  
5 52 Développement (IRD; 10/24/2017). The study results will be disseminated through the direct  
6  
7 53 consultations with the WHO's TDR-MIM and Roll Back Malaria program, through scientific  
8  
9 54 meetings and peer-reviewed publications in scientific or medical journals, and through  
10  
11 55 guidelines and booklets.  
12  
13  
14  
15  
16

### 17 **Strengths and limitations of this study**

- 18  
19 58 ➤ This case-control study aims to identify the causative factors of neuroinflammation in  
20  
21 59 the context of cerebral malaria
- 22  
23 60 ➤ This study will inform on the etiologies and management of non-malarial non-traumatic  
24  
25 61 coma in small children
- 26  
27 62 ➤ The final products of NeuroCM are expected to feed the pipeline of new therapeutic  
28  
29 63 (immune intervention) and preventive (vaccine) strategies that will improve cerebral  
30  
31 64 malaria outcome
- 32  
33 65 ➤ This study does not have the power to investigate all etiologies of fever in Benin.  
34  
35 66 Contrary to the malaria groups, there is no information on the frequency of non-malarial  
36  
37 67 non-traumatic coma admissions, and no certainty on the number of children who will  
38  
39 68 included in the non-malarial non-traumatic group.
- 40  
41 69 ➤ According to the limited number of patients, conclusions will further need to be  
42  
43 70 confirmed in larger studies  
44  
45  
46  
47  
48

49 71  
50  
51  
52  
53  
54  
55  
56  
57  
58  
59  
60

## 72 Introduction

73 Malaria is triggered by an apicomplexan parasite, *Plasmodium spp.* Six *Plasmodium* species  
74 can infect humans, with *Plasmodium falciparum* (*P. falciparum*) being the most frequent in  
75 Sub-Saharan Africa (99.7% of estimated cases in 2017). *P. falciparum* is the agent of severe  
76 malaria and responsible for most malarial deaths.

77 In 2017, an estimated 219 million cases and 435,000 deaths of malaria occurred worldwide, in  
78 91 countries<sup>1</sup>. Despite a recent decrease in malaria mortality due to extensive malaria control  
79 through insecticide impregnated bednets and increased use of artemisinin derivatives, 275,000  
80 children still die every year from malaria. Most cases and deaths were in African region  
81 (respectively 92% and 93%). Severe malaria occurs mostly in non-immune patients and in Sub-  
82 Saharian Africa and 90% of severe malaria affect young children<sup>2</sup>. In endemic states, malaria  
83 is one of the three major causes of hospitalization in children under five years old.

84 Benin is in West Africa, along the Guinea gulf. In 2018, 11.5 million people live in Benin, most  
85 of them in South-Benin. Malaria transmission occurs seasonally, during rainy seasons (from  
86 May to August and October). According to the Beninese health department in 2016, malaria is  
87 responsible for 26.8% of disease reports in consultation and hospitalization in the general  
88 population and for 20.9% in children under five years old<sup>3</sup>. It is also the first morbidity cause  
89 in the general population with a prevalence of 39.7% in 2013, followed by respiratory infections  
90 in 12.4% cases and gastro-intestinal disease for 6.4%<sup>4</sup>.

91 According to the World Health Organization (WHO), severe *falciparum* malaria is defined by  
92 the association between *P. falciparum* asexual parasitaemia and the presence of one or more of  
93 the clinical or laboratory features (with no other confirmed cause for their symptoms) presented  
94 in table 1. Cerebral malaria (CM) is defined by the presence of asexual form of *P. falciparum*  
95 associated with Blantyre score  $\leq 2$  (Table 2). CM is a coma which persists for  $> 1h$  after a  
96 seizure irrespective of anticonvulsant medications. Clinical criteria for CM diagnosis are

1  
2  
3 97 currently debated, and it has been highlighted that a *P. falciparum* parasitaemia can be observed  
4  
5 98 in comatose children with coma related to a non-malarial central nervous system disease<sup>5</sup>,  
6  
7 99 leading to a possible overestimation of CM cases. A recent study in Malawi found that 25% of  
8  
9  
10 100 CM cases were misdiagnosed and that many children may have had a viral meningoencephalitis  
11  
12 101 concomitant to a malarial infection<sup>5</sup>. Implementation of fundoscopic examination (in order to  
13  
14 102 look for malaria retinopathy signs)<sup>6</sup> and microbiological investigations (blood culture,  
15  
16 103 cerebrospinal fluid (CSF) culture, CSF multiplex PCR) could limit the overestimation of CM  
17  
18 104 diagnosis, but fundoscopic examination requires trained physicians and microbiological  
19  
20 105 investigations are expensive. Clinical research needs to focus on new clinical or diagnostic tools  
21  
22 106 designed to help physicians in order to better diagnose CM.  
23  
24 107 NeuroCM study aims to collect data (such as blood and cerebrospinal fluid culture, fundoscopic  
25  
26 108 examination) on coma's etiologies in Beninese young children.  
27  
28  
29 109 Without treatment, CM is invariably fatal. Even with parenteral artemisinin use, severe malaria  
30  
31 110 death rate is 20%<sup>7</sup>. In case of severe or CM, patients should be hospitalized in an intensive care  
32  
33 111 unit. Conscience status, blood pressure, heart and respiratory rates, diuresis and oxygen  
34  
35 112 saturation have to be monitored every six hours<sup>8</sup>. Parenteral artemisinin instead of quinine is  
36  
37 113 recommended at a posology of 2.4 mg/kg by injection (3 mg/kg in children under 20 kg of body  
38  
39 114 weight) at diagnosis, 12 and 24 hours later and then daily until patients can take oral drugs<sup>7</sup>.  
40  
41 115 Benzodiazepine should be used to treat convulsions (diazepam 0.3 mg/kg; midazolam or  
42  
43 116 lorazepam). It seems accepted that CM surviving patients generally don't present any  
44  
45 117 neurological sequelae and fully recover their neurological capacity. However, immediate  
46  
47 118 neurological after-effect is described in 6.7 to 11.6% of cases<sup>7,9</sup> and a recent meta-analysis  
48  
49 119 found a relation between CM and neurologic disease<sup>10</sup>. The NeuroCM study will collect data  
50  
51 120 on children's clinical recovery at discharge and 21-28 days later.  
52  
53  
54  
55  
56  
57  
58  
59  
60

1  
2  
3 121 Tools for malaria control are less and less effective. On one hand, *P. falciparum* drug resistance  
4  
5 122 is a growing concern. Resistance to chloroquine, one of the main anti-malarial drugs, appeared  
6  
7 123 during the sixties in South-East Asia and then spread to Africa<sup>11,12</sup>. Artemisinin-combined  
8  
9 124 therapy became the treatment of choice for malaria with the aim to reduce the risk of parasites  
10  
11 125 developing resistance<sup>13</sup>, but resistance appeared in South-East Asia in 2008<sup>14</sup> and was  
12  
13 126 confirmed in others studies<sup>15</sup>. It has not, hitherto, spread to Africa but this is a real concern for  
14  
15 127 the WHO<sup>16</sup>. On the other hand, mosquitos become more and more resistant to insecticides,  
16  
17 128 making antivectorial prevention more and more difficult<sup>17</sup>. Thus, research for new therapies is  
18  
19 129 needed.

20  
21  
22  
23 130 Pathophysiology of CM is complex and multifactorial, based on both parasite and host immune  
24  
25 131 factors. It is currently believed that CM is caused by dedicated parasite variants that specifically  
26  
27 132 localize in brain through interaction between parasite proteins expressed on the surface of the  
28  
29 133 infected erythrocytes (iE) and brain endothelium. This sequestration occurs with erythrocytes  
30  
31 134 infected with late stage of *P. falciparum* (trophozoites and schizonts). Binding of iE to  
32  
33 135 endothelial vascular cells is mediated by Variant Surface Antigens (VSA). *Plasmodium*  
34  
35 136 virulence is linked to its ability to express VSA<sup>18</sup>. VSA include three different multigenic  
36  
37 137 families: *var*, *rifin* and *stevor*. More specifically, *var* genes coding for PfEMP1 proteins are  
38  
39 138 highly polymorphic and present in sixty copies in *P. falciparum* genome. Those PfEMP1 are  
40  
41 139 expressed on iE surface and are responsible for endothelial receptors binding, such as  
42  
43 140 Chondroitin Sulfate A (CSA) and Endothelial Protein C Receptor (EPCR) or InterCellular  
44  
45 141 Adhesion Molecule (ICAM) respectively involved in placental malaria<sup>19</sup> and severe malaria<sup>20</sup>.  
46  
47 142 PfEMP1 family has been clearly associated with binding of iE to the microvascular endothelium  
48  
49 143 of every organ and tissue<sup>21</sup>. We now better understand iE's binding on placenta<sup>22</sup> and vaccine  
50  
51 144 development to prevent gestational malaria seems an achievable goal. By contrast, research is  
52  
53 145 still needed to understand which type of proteins specifically binds to cerebral endothelial  
54  
55  
56  
57  
58  
59  
60

1  
2  
3 146 receptor. In a previous study conducted in Benin, we identified several proteins associated with  
4  
5 147 CM<sup>23</sup>.

7  
8 148 The finding of a PfEMP1 variant specifically related to CM could pave the way to the  
9  
10 149 development of a vaccine targeting this specific protein. Studying the transcriptomic and  
11  
12 150 proteomic profiles of plasmodial strains involved in CM compared to strains involved in  
13  
14 151 uncomplicated malaria (UM) is a first step to better understand related mechanisms to cerebral  
15  
16 152 endothelium binding.

17  
18  
19 153 The host immune aspect of the pathophysiology of CM are the consequences of microvascular  
20  
21 154 sequestration of iEs and rosettes (non-infected red blood cells) in brain. Such sequestration  
22  
23 155 leads to blood flow obstruction, ischemia/hypoxia and local inflammation resulting in  
24  
25 156 neuroinflammation<sup>24-28</sup>. The way this cascade of events is linked and the reasons why they result  
26  
27 157 in death or inflammation resolution remains to be elucidated. Acute cerebral ischemia is known  
28  
29 158 to drive microglia activation and influx of myeloid immune cells to the brain. Resident  
30  
31 159 microglia and infiltrating monocytes/neutrophils have a critical role in initiating, sustaining  
32  
33 160 (M1 polarization) and resolving (M2 polarization) post-ischemic inflammation<sup>29-31</sup>. Another  
34  
35 161 important immune aspect of neuroinflammation during CM is redox equilibrium. The  
36  
37 162 production of reactive oxygen species both by parasites (haemoglobin digestion) and  
38  
39 163 monocytes/macrophages are thought to cause damages to neurons<sup>32</sup>. This process leads to BBB  
40  
41 164 permeability and neurodegeneration<sup>33,34</sup>. In order to counterbalance the excess of oxidants,  
42  
43 165 oxidant scavengers and antioxidant enzymes may be produced. NO bioinsufficiency and  
44  
45 166 subsequent vasoconstriction constitute other important aspects of CM pathophysiology<sup>35</sup>. Haem  
46  
47 167 and superoxide anion release during infection leads to NO mobilization for detoxification,  
48  
49 168 depriving vascular smooth muscle cells in NO and leading to inflammation-related  
50  
51 169 vasospasm<sup>35,36</sup>. Although vasospasm has not been clearly associated to death risk during CM<sup>37</sup>,  
52  
53 170 NO pathway deserves a better understanding during CM pathophysiology. In the NeuroCM  
54  
55  
56  
57  
58  
59  
60

1  
2  
3 171 study, we intend to better understand mechanisms of neuroinflammation and its resolution in a  
4  
5 172 context of CM, by comparing data collected in children presenting with CM, in children  
6  
7 173 hospitalized for non-malarial non-traumatic coma, and in children with UM. We will focus our  
8  
9 174 studies on markers of immune cell migration and polarization (towards inflammatory or  
10  
11 175 resolutive phenotypes), of pro- or anti-oxidant response, and of pro- or anti-inflammatory  
12  
13 176 response through urine and blood samples analysis at inclusion, 3 and 21 to 28 days post-  
14  
15 177 inclusion.  
16  
17  
18  
19  
20  
21  
22

### 23 179 **Study objectives**

24 180 The main objective is to identify the causative factors of neuroinflammation in the context of  
25  
26 181 CM. There are currently very few systematic data from West Africa on the etiologies and  
27  
28 182 management of non-traumatic coma in small children, and NeuroCM will bring new  
29  
30 183 information on these aspects. We postulate that an accurate understanding of molecular and  
31  
32 184 cellular mechanisms involved in neuroinflammation may help to define efficient strategies to  
33  
34 185 prevent and manage CM.  
35  
36  
37  
38  
39

40 187 There are three distinct objectives in this study.  
41  
42  
43

44 189 *I. To identify parasitological factors associated with P. falciparum CM or UM*

46 190 We expect to identify and validate *P. falciparum* virulence factors associated with CM by  
47  
48 191 comparison with UM. Once proteins of interest will be found, functional studies will help to  
49  
50 192 better understand their role in CM.  
51  
52  
53

54 193  
55  
56 194 *II. To identify immune host factors associated with fatal or favorable outcome of CM*  
57  
58  
59  
60



1  
2  
3 195 We expect to better understand which mechanisms trigger neuroinflammation and its resolution  
4  
5 196 during CM by comparing three groups of children: presenting with CM, hospitalized for non-  
6  
7 197 malarial non-traumatic coma, and presenting with UM. We aim to identify therapeutic  
8  
9 198 molecular targets involved in neuroinflammation resolution.  
10  
11  
12 199

### 14 200 *III. To describe coma's etiology in Sub-Saharan Africa*

16 201 We expect to improve knowledge in non-malarial non-traumatic coma's etiologies in Sub-  
17  
18 202 Saharian Africa in order to improve young children's coma management and inform health  
19  
20 203 public policies on the role played by infections that could be prevented by vaccination.  
21  
22  
23  
24 204

## 25 205 **Methods and analysis**

### 26 206 Design

27  
28  
29  
30 207 This is a prospective, case-control study comparing CM to UM and non-malarial non-traumatic  
31  
32 208 coma. Patients will be recruited in South Benin, in two different hospitals for coma and in a  
33  
34 209 dispensary for UM, as UM is rarely detected in hospitals where children with coma are  
35  
36 210 managed. This study is conducted by one Beninese research team (CERPAGE, Centre d'Etude  
37  
38 211 et de Recherche sur le Paludisme Associé à la Grossesse et à l'Enfance) and three French  
39  
40 212 research teams (UMR D216 MERIT in Paris carrying the project, UMR D152 PHARMADEV  
41  
42 213 in Toulouse, UMR S1094 NET in Limoges).  
43  
44  
45  
46  
47  
48

### 49 215 Study environment

50  
51 216 This study takes place in Benin, precisely in Cotonou and Calavi for the hospital's recruitment.  
52  
53 217 UM recruitment takes place in Sô-Ava district. Cotonou is the largest city and economic centre  
54  
55 218 of Benin, with an estimated population of 679,012 habitants in 2013.  
56  
57  
58  
59  
60

1  
2  
3 219 The two recruitment hospitals are the CHU-MEL (CHU-Mère et Enfant de la Lagune) and  
4  
5 220 Hôpital de zone de Calavi. Routine laboratory analysis, except bacteriology, are performed on  
6  
7 221 site for children included with coma and at IRCB (Institut de Recherche Clinique du Bénin) for  
8  
9 222 children with UM. Bacteriological analyses are performed in the microbiology laboratory of  
10  
11 223 CNHU (Centre National Hospitalier Universitaire). Research analyses are done in the  
12  
13 224 CERPAGE laboratory.  
14  
15  
16  
17  
18

### 19 226 Participants

20  
21 227 We aim to include 3 different clinical groups of 100 children between 24 and 71 months during  
22  
23 228 12 months (from December 2017 to November 2018). This duration has been determined  
24  
25 229 according to previous studies in Benin<sup>38</sup>.

26  
27 230 In the **first group**, a diagnosis of CM will be defined as follows: positive *P. falciparum* thin  
28  
29 231 blood smear with a Blantyre score  $\leq 2$  with exclusion of patients presenting: positive  
30  
31 232 bacteraemia, meningitis proved or suspected (leucocytes in cerebrospinal fluid  $> 1000$  per  
32  
33 233 microliter and/or Gram positive in LCS and/or LCS bacterial culture positive and/or PCR  
34  
35 234 positive for any bacteria or virus).

36  
37 235 In the **second group**, a diagnosis of non-malarial non-traumatic coma will be defined as  
38  
39 236 follows: Blantyre score  $\leq 2$  and no *Plasmodium* infection as detected by thin blood smear.

40  
41 237 In the **third group** UM will be defined as follows: 1) fever at inclusion or within 24 hours  
42  
43 238 before, 2) no clinical or biological sign of severe malaria (table 1), no danger signs and no other  
44  
45 239 obvious cause of fever and 3) *P. falciparum* parasitaemia between 1,000 to 500,000 parasites  
46  
47 240 per microliter.  
48  
49  
50  
51  
52

53 241

### 54 242 Inclusion and exclusion criteria

1  
2  
3 243 For all children, the first inclusion criterion is parental acceptance that their child participate in  
4  
5 244 the study after information has been given (see section “Ethics and safety considerations”).  
6  
7 245 Inclusion criteria for coma (CM and non-malarial non-traumatic coma) are: age between 24 to  
8  
9 246 71 months, Blantyre score  $\leq 2$ , negative HIV Rapid Diagnostic Test (RDT). Non-inclusion  
10  
11 247 criteria are: pre-existent neurologic disease and traumatic or toxic coma.  
12  
13 248 Inclusion criteria for UM are: age between 24 to 71 months, fever  $> 38^{\circ}\text{C}$  at inclusion or within  
14  
15 249 24 hours before and no clinical severity/danger sign, positive malaria RDT, negative HIV RDT.  
16  
17 250 Exclusion criteria for coma are: thick and thin blood smear not realized at day 0 (D0) and/or  
18  
19 251 biological blood test no realized at D0 and/or research blood test not realized at D0.  
20  
21 252 Exclusion criteria for UM are: thick and thin blood smear not realized at day 0 (D0) and/or  
22  
23 253 biological blood test no realized at D0 and/or research blood test not realized at D0 and/or  
24  
25 254 laboratory indices for severe malaria and/or thick and thin blood smear negative for *P.*  
26  
27 255 *falciparum* and/or parasite density under 1000 parasite per microliter or higher than 500,000  
28  
29 256 parasites per microliter. To evidence a significant difference between CM and UM groups in  
30  
31 257 the ratio of endogenous mediators associated with inflammation resolution, we estimated that  
32  
33 258 a sample size of 100 subjects per group was sufficient to reach the main study target, i.e., by  
34  
35 259 linear regression analysis involving a maximum of 6 predictors and an  $R^2$  value of 0.400,  
36  
37 260 ensuring an 80% power and a 5% probability of type I error. This sample size also complies  
38  
39 261 with the requirements of the RT-qPCR analysis used to validate the discrimination of CM and  
40  
41 262 UM samples obtained by SARTools, and finally with the overall funding request of the project.  
42  
43  
44  
45  
46  
47  
48  
49  
50

## 264 Recruitment process

### 265 *Step 1: Enrolment/screening*

266 For CM and non-malarial non-traumatic coma group, every young child with neurologic  
267 symptoms is screened for eligibility. For UM group, every child presenting at the outpatient  
268

1  
2  
3 268 clinic with fever or fever during the previous 24 hours is screened. The first step is patients'  
4  
5 269 screening to confirm study eligibility and provide participants with information about the study.  
6  
7  
8 270 A questionnaire assessing eligibility will inform on home addresses, sociodemographic data  
9  
10 271 (number of children in the family, ethnical group...), clinical history, use of mosquito net and  
11  
12 272 vaccination status. Informed consent is then obtained from the parents or caregivers.  
13  
14 273 The following tests are performed to screen for malaria and to rule out HIV infections: a RDT  
15  
16 274 detecting HRP2 for *P. falciparum* detection and Determine HIV-1/2 set, Alere for HIV  
17  
18 275 detection.  
19  
20

21 276 *Step 2: Clinical examination and biological sample/analysis*

22  
23 277 A clinical examination is performed by a study physician for children hospitalized with coma,  
24  
25 278 and by a study nurse for UM. In the coma group, a fundoscopic assessment is performed  
26  
27 279 (Eyepax 1.0 Dioptrix) and pictures are captured and downloaded on an online database. The  
28  
29 280 clinical data entry is performed on an online case report form.  
30  
31

32  
33 281 In order to allocate children to their respective groups, biological analyses according to severe  
34  
35 282 malaria are needed. For coma's inclusion: thick and thin blood smear analysis, complete blood  
36  
37 283 count (CBC) (Sysmex KX-21N, Sysmex XT-1800i and ABS Micro ES 60), biochemistry  
38  
39 284 analysis (Na<sup>+</sup>, K<sup>+</sup>, Cl<sup>-</sup>, Ca<sup>++</sup>, HCO<sub>3</sub><sup>-</sup>, albumin, urea, creatinine, glucose, lactate) with Piccolo  
40  
41 285 Sysmex and ALAT plus bilirubine (Biolabo Kenza Max biochemistry and Mindray BS-200)  
42  
43 286 are performed on site. Blood culture, Gram staining and bacterial culture for CSF are realized  
44  
45 287 in a university hospital reference laboratory. Biomérieux Biofire™ FilmArray™  
46  
47 288 Meningitis/Encephalitis Panel multiplex PCR (looking for *E. coli*, *H. influenzae*, *L.*  
48  
49 289 *monocytogenes*, *N. meningitidis*, *S. agalactiae*, *S. pneumoniae*, cytomegalovirus, enterovirus,  
50  
51 290 Epstein-Barr virus, herpes simplex virus (HSV) 1, HSV2, human herpesvirus 6, paraechovirus,  
52  
53 291 varicella zona virus and *Cryptococcus neoformans* and *C. gattii*) will be further performed in  
54  
55 292 France. The required following samples are needed: one EDTA tube (2 mL) for CBC and  
56  
57  
58  
59  
60

1  
2  
3 293 malaria diagnostic, one heparin tube (2 mL) for biochemistry analysis, one cerebrospinal  
4  
5 294 sample (1 mL), one blood sample for blood culture (5 mL) for routine analyses, two additional  
6  
7  
8 295 EDTA tubes (6 mL) and 50 mL of urine for research analyses.

9  
10 296 For UM inclusions: severe malaria was ruled out according to results from blood cell count  
11  
12 297 (Sysmex XS500i), biochemistry analysis (bilirubin, glucose, creatinine) on Selectra pro  
13  
14 298 automate (Elitech group) and thick and thin blood smear. The following samples are needed:  
15  
16 299 one EDTA tube (2 mL), one heparin tube (2 mL) and one fluorinated tube (2mL) for routine  
17  
18  
19 300 analyses, two additional EDTA tubes (6 mL) and 50 ml of urine for research analyses.

### 21 301 *Step 3: Research analyses*

22  
23  
24 302 A part of research analyses is realized in Cerpage lab. One to 1.5 mL of blood is cultured in  
25  
26 303 supplemented Roswell Park Memorial Institute (RPMI) 1640 medium with Albumax (Gibco)  
27  
28 304 for less than 48 hours until parasites reach the mature stage (from young trophozoite to  
29  
30 305 schizont), then purified using magnetic-activated cell sorting (MACS; Milteny Biotec, Bergisch  
31  
32 306 Gladbach, Germany) for binding and endothelial cell activation assay. The resulting mature  
33  
34 307 stage are stored at -80°C for further mass spectrometry protein analysis. Two hundred µL of  
35  
36 308 whole blood samples are conserved at -20°C for DNA analysis, 200 µL are transferred in  
37  
38 309 TRIZol reagent (Life technologies, France) and stored at -80°C for further RNA extraction<sup>39</sup>,  
39  
40 310 and 200 µL in liquid nitrogen for parasite cryoconservation. Plasma samples are conserved at -  
41  
42 311 20°C and -80°C respectively for immune response analysis and dosage of biomarkers.  
43  
44  
45 312 Peripheral blood mononuclear cells (PBMC) are separated from red blood cells by Ficoll  
46  
47 313 density gradient and stored in liquid nitrogen. Finally, urines are stored at -80°C for further  
48  
49 314 analysis. See table 3 for detailed research planning.

50  
51  
52 315 Parasite factors analyses will be performed in several ways. We will compare CM and UM  
53  
54 316 isolates with whole genome DNA sequencing; RNA-sequencing and by quantitative MS  
55  
56 317 analysis. Highly polymorphic *var* genes will be assembled and BLASTed against peptide hits  
57  
58  
59  
60

1  
2  
3 318 from the MS approach. Nucleotide primers will be designed with DNA-sequencing data and  
4  
5 319 used in RT-qPCR to validate the RNA-seq data. Associations between gene polymorphisms  
6  
7 320 and modifications in RNA nature and quantity detected by RNA-seq will be investigated. Then,  
8  
9 321 we will use recombinant protein and *P. falciparum* genome modification by gene disruption to  
10  
11 322 study proteins' role.

12  
13  
14 323 Host factors study will be based on the analysis of PBMC, plasmas and urine samples of the  
15  
16 324 three groups of children. PBMC analysis will focus on the phenotyping of monocytes to  
17  
18 325 distinguish M1 and M2-like phenotypes. Flow cytometry will be used to measure expression  
19  
20 326 levels of CD11b and CD16 as M1 markers, and CD163 and CD206 as M2 markers. The  
21  
22 327 assessment of gene expression levels of cytokines, chemokines and their receptors by RT-qPCR  
23  
24 328 will complete phenotype analysis. Plasmas and urine samples will allow to measure redox (L-  
25  
26 329 arginine and biopterins), pro-/anti-inflammatory (cytokines, chemokines and lipid mediators  
27  
28 330 such as eicosanoids) and pro-resolving mediators (such as prostaglandins and lipoxins) by  
29  
30 331 ELISA or EIA. We will first compare data from the group of CM to the two other groups in  
31  
32 332 order to identify the biological markers best related to inflammation and neurological  
33  
34 333 impairment during CM. Second, we will analyze data obtained with the two coma groups at  
35  
36 334 inclusion (Day 0), at Day 3 and Day 30 to understand the kinetics of immune events and its  
37  
38 335 relation to death or favorable outcome. Finally, we will search for severity and death risk factors  
39  
40 336 within the CM groups.

#### 41 42 43 44 45 46 337 *Step 4: Coma follow-up*

47  
48 338 In children presenting with coma, both clinical data and blood samples are collected at day 3  
49  
50 339 (D3) and day 21-28 (D21-28) on disease outcome, and for research purpose. One EDTA tube  
51  
52 340 (6 mL) and 50 mL urine will be sampled. In order to prevent losses, parents/guardians are called  
53  
54 341 a few days before D21-28 to remind them of follow-up visit. No follow-up visit is scheduled  
55  
56 342 for children with UM.  
57  
58  
59  
60

343

### 344 Data management

345 Data, including clinical, biological and research results are collected and managed using CS  
346 online-Ennov clinical (<https://ufrcb.chu-limoges.fr/crfonline/>). It is a secure, web-based  
347 application designed to support data capture for research studies. Study participants are  
348 identified by a code and have their own account. The two physicians and the nurse were trained  
349 to entry the data on included children in the database. Nobody can delete a patient created in  
350 the base, except the Data manager.

351 Data & Safety Monitoring Board (DSMB), composed by two physicians specialized in  
352 infectious disease and one statistician, will review allocation of children to the pre-defined study  
353 groups and discuss possible deviations from the expected number of subjects in the groups.

354

### 355 Data analysis

356 In a first step, descriptive statistics will be realized by calculating mean and standard deviation  
357 (sd) for quantitative variables, and proportion for qualitative variables to determine the main  
358 characteristics of the three clinical groups.

359 Focusing on cerebral and UM children the MS/MS data will be searched against the databases  
360 (UNIPROT and PlasmoDB<sup>40</sup>), the proteins will be considered as positive hits with at least two  
361 peptides. The MaxQuant software will be used to compare malaria protein expression between  
362 isolates of these two clinical groups. Transcriptomic data will be analyzed with Galaxy  
363 (<https://usegalaxy.org/>) and R software (<https://www.r-project.org/>)<sup>41</sup>. The raw data will be  
364 trimmed with Trimmomatic tool for Phred Quality Score Qscore >20, read length >30 bases,  
365 and ribosome sequences will be removed with tool sortMeRNA. Reads will be mapped against  
366 the *P. falciparum* 3D7 reference genome combined with *var* transcript sequences from 7 *P.*  
367 *falciparum* genomes. Differential expression analysis on RNAseq data will be performed using

1  
2  
3 368 the DESeq2<sup>42</sup> package considering a 1 log-fold increase as significant using adjusted  $p$  value <  
4  
5 369 0.05. Data normalization will be realized with DESeq2 software, with hypothesis that there  
6  
7  
8 370 exists genes overexpressed and underexpressed and that majority of genes are not expressed in  
9  
10 371 a differential way. Transcript expression levels (evaluated with RT-qPCR) will be compared by  
11  
12 372 T-tests and ANOVA of transformed outcomes.

13  
14 373 Regarding immune response analysis, potential markers related to inflammation and  
15  
16 374 neurological symptoms will be compared using variance analysis in samples from children from  
17  
18 375 the three groups, CM, UM and non-malarial non-traumatic group. The groups will be compared  
19  
20 376 two by two with a linear regression, with a special attention to CM/UM comparison. Adjustment  
21  
22 377 variables such as age, sex, ethnical group, time to hospital transfer, body temperature, and co-  
23  
24 378 morbidities will be taken into account in the model. The threshold for significance level will be  
25  
26 379 0.05, and a Bonferroni correction will be applied to take into account multiple testing. It will  
27  
28 380 be further determined if a global comparison between the three groups will be made. Generally  
29  
30 381 speaking, the non-malarial non-traumatic coma group will be used as a comparator to analyze  
31  
32 382 specific effect of malaria in neuroinflammation development. The second major question to be  
33  
34 383 answered to is, within the CM group, whether the changes of the inflammation markers between  
35  
36 384 D0 (admission) and D3 are predictive of the outcome (survival/death). A logistic model  
37  
38 385 (univariate then multivariate) will be used for this analysis. The same adjustment variables will  
39  
40 386 be used as in the comparison between groups. The dependent variable will be the outcome  
41  
42 387 survival/death.

43  
44 388 The last model (also a logistic regression) will study the changes in inflammation markers  
45  
46 389 between D3 and D21 in the survivors in order to determine if they are predictive of a favorable  
47  
48 390 evolution. The dependent variable will be the outcome, here the discharge from the hospital  
49  
50 391 without apparent sequelae.  
51  
52  
53  
54  
55  
56  
57  
58  
59  
60



1  
2  
3 392 Missing data are not expected to affect more than 10% of the records for the main factors that  
4  
5 393 will be analyzed. Should they be over 5%, an imputation method such as the MICE method will  
6  
7 394 be applied, as the errors can be considered at random<sup>43</sup>. No proteomic analysis for immune  
8  
9 395 marker will be done.  
10  
11  
12 396  
13  
14 397

### 16 17 398 Patient and public involvement

18  
19 399 From patients' experience and preference, follow-up of children admitted with coma was  
20  
21 400 scheduled in order to be able to detect neurological sequelae. The diagnostic workup proposed  
22  
23 401 to all children included into the study, although not affordable to all patients in routine practice,  
24  
25 402 met parent's expectations on what health facilities should provide to all patients. All patients  
26  
27 403 were recruited in health facilities where they usually seek care, and to that respect patients were  
28  
29 404 involved in their recruitment process. Finally, results will not be disseminated directly to study  
30  
31 405 participants but through peer-reviewed scientific journal and conference presentations.  
32  
33  
34  
35 406

### 36 37 407 **Ethics and dissemination**

#### 38 39 408 Ethics and safety considerations

40  
41  
42 409 Ethics approval for the NeuroCM study has been obtained from *Comité National d'Ethique*  
43  
44 410 *pour la Recherche en santé* of Benin (n°67/MS/DC/SGM/DRFMT/CNERS/SA; 10/17/2017).  
45  
46 411 NeuroCM study has also been approved by the *Comité consultatif de déontologie et d'éthique*  
47  
48 412 of Institut de Recherche pour le Développement (IRD; 10/24/2017).  
49  
50 413 Parents/guardians will be given an oral information by the physician or the nurse and an  
51  
52 414 opportunity to ask question and refuse the protocol. Patient's confidentiality will be ensured  
53  
54 415 and anonymity guaranteed by anonymous coding given at the inclusion.  
55  
56  
57  
58 416  
59  
60

1  
2  
3 417 Dissemination  
4

5 418 The main benefits of NeuroCM are targeted on people living in malaria endemic countries. The  
6  
7 419 study results will be disseminated through a variety of instruments to ensure that a broad range  
8  
9 420 of both specialists and non-specialists are informed and can properly benefit from the findings.  
10  
11 421 First, through the direct consultations with the WHO's TDR-MIM, Roll Back Malaria program  
12  
13 422 to reach the wider public health audience; through scientific meetings and peer-reviewed  
14  
15 423 publications in scientific or medical journals to reach the scientific/medical/public health  
16  
17 424 communities; through guidelines targeting the medical and paramedical staff for optimization  
18  
19 425 of severe malaria management, through booklets (e.g. first aid procedures and adapted behavior  
20  
21 426 in case of emergency) elaborated and adapted to the population of Benin.  
22  
23  
24  
25

26 427

27  
28 428 **Discussion**  
29

30 429 CM is the most life-threatening form of malaria with high mortality rate in young children.  
31  
32 430 Mortality related to malaria is still high in children population and accurate CM diagnosis  
33  
34 431 remains challenging. Among CM surviving children, up to 25% have long-term neuro-cognitive  
35  
36 432 deficits (visual/hearing/cognitive/language impairment/ataxia/hemiparesis/motor deficit...),  
37  
38 433 and 10% show evidence of mental health disorders<sup>44</sup>. As CM might be one of the more common  
39  
40 434 causes of epilepsy in malaria-endemic regions, the burden of CM neurological sequelae may be  
41  
42 435 largely underestimated, but difficult to estimate because diagnosis is challenging in malaria-  
43  
44 436 endemic regions. Bacterial or viral central nervous system infections may occur in children with  
45  
46 437 malarial infection; this may not only originate overdiagnosis of CM, but also may overlook  
47  
48 438 potential bacterial and viral central nervous system infections.  
49

50  
51 439 Patients were included in different areas reflecting the health care system in Benin. UM patients  
52  
53 440 could not be included in hospital centers such as the CHU-MEL (Cotonou) hospital, and  
54  
55 441 Calavi's hospital, because outpatients with UM rarely seek care in these centers. In 2014, a pilot  
56  
57  
58  
59  
60

1  
2  
3 442 study aimed to include UM patients in the Cotonou CHU-MEL, and highlighted the absence of  
4  
5 443 UM cases in hospitals. However, patients from the So-Ava areas are referred to the main  
6  
7 444 hospital centers when patients present severe malaria (or any severe illness that cannot be  
8  
9 445 monitored and managed in dispensary). In 2016, we aimed to include patients suffering from  
10  
11 446 cerebral malaria in the So-Ava, and realized that first, patients were directly sent to the main  
12  
13 447 hospitals, and second, that it would not be ethical to include severe malaria cases in these health  
14  
15 448 structures due to the facility itself. A multi-center study for UM cases inclusion, using the main  
16  
17 449 patient's origin from the corresponding hospital, would have been more even accurate. This  
18  
19 450 represents a possible limitation of our study.

20  
21  
22  
23 451 The expected impact of NeuroCM is of great magnitude. First, NeuroCM is an attempt to  
24  
25 452 propose improvements for the diagnosis of CM. It will provide as far as possible, for the first  
26  
27 453 time in West Africa, an identification of the causes of coma in the study area. Second, thanks  
28  
29 454 to DNA, RNA and protein analyses, NeuroCM will allow to identify new parasite targets for a  
30  
31 455 vaccine to prevent CM. Third, NeuroCM will provide data on the kinetics of appearance of  
32  
33 456 inflammatory and pro-resolving molecular and cellular events in brain during CM. The role of  
34  
35 457 endogenous mediators in neuroinflammation resolution during CM will be clarified, with  
36  
37 458 emphasis on pro-oxidant components and lipid mediators. NeuroCM will also identify markers  
38  
39 459 allowing the definition of an immunological state in the process of neuroinflammation  
40  
41 460 resolution in CM patients. Our experimental murine model will allow the formulation of new  
42  
43 461 hypothesis while proof of concept will be achieved through the correlation of our proposed  
44  
45 462 targets with patient morbidity and mortality parameters. In the future, it may allow clinicians to  
46  
47 463 better manage CM, with specific pro-resolving drugs for instance.

48  
49  
50  
51 464 The final products of NeuroCM are expected to feed the pipeline of new therapeutic (immune  
52  
53 465 intervention) and preventive (vaccine) strategies to improve CM outcome, as well as other  
54  
55 466 diseases involving neuroinflammation.  
56  
57  
58  
59  
60

1  
2  
3 4674  
5 468 **Authors contributions**

6  
7 469 VJ and JFF drafted the manuscript. GB, AA, SH, DA, NA, MC, PD and JFF revised the  
8  
9  
10 470 manuscript. GB, AA, FB, SH, DA, NA, MC, PD and JFF designed the study. VJ and LM  
11  
12 471 organized the study in the field. AM, IDD and JA implemented the study in the field. All  
13  
14 472 members of the NeuroCM group have substantially contributed to the conception, design or  
15  
16 473 organization of the study. All authors approved the final version to be submitted to the journal.

17 474

18  
19  
20  
21 475 **Collaborators**

22  
23 476 NeuroCM group: Dissou Affolabi, H el ene Authier, Linda Ayedadjou, Bibiane Biokou, Agn es  
24  
25 477 Coste, Jean-Eudes Degbelo, Latifou Dramane, Sayeh Jafari-Guemouri, Claire Kamaliddin,  
26  
27 478 Elis ee Kinkpe, Ana ıs Labrunie, Y el e Ladipo, Thomas Lathiere, Audrey Mowendabeka, Jade  
28  
29 479 Papin, Bernard Pippy, Pierre-Marie Preux, Marie Raymondeau, Jade Royo, Darius Sossou,  
30  
31 480 Brigitte Techer, Bertin Vianou.

32  
33 48134  
35  
36  
37 482 **Funding**

38  
39 483 This work was supported by the French Agence Nationale de la Recherche, under contract  
40  
41 484 ANR-17-CEI 7-0001-01.

42  
43 48544  
45  
46  
47 486 **Competing interests**

48  
49 487 No competing interest.

50  
51 48852  
53  
54 489 **Data availability statement**

55  
56 490 There are no data in this work.

57  
58 491

1  
2  
3 492 **Word Count**  
4

5 493 4,696 words  
6  
7  
8 494

9  
10 495 **References**  
11

- 12 496 1. World Health Organization. World malaria report 2018. Available at:  
13  
14 497 <https://www.who.int/malaria/publications/world-malaria-report-2018/en/>  
15  
16  
17 498 2. Black RE, Cousens S, Johnson HL, *et al.* Global, regional, and national causes of child  
18  
19 499 mortality in 2008: a systematic analysis. *Lancet* 2010;375:1969–87.  
20  
21 500 3. Beninese health department. Annuaire des statistiques sanitaires 2016. Available at:  
22  
23 501 [http://www2.sante.gouv.bj/IMG/pdf/annuaire\\_stat\\_pas\\_2016.pdf](http://www2.sante.gouv.bj/IMG/pdf/annuaire_stat_pas_2016.pdf)  
24  
25  
26 502 4. World Health Organization. Stratégie de coopération de l'OMS avec le Bénin: 2016-  
27  
28 503 2019. Available at: <http://apps.who.int/iris/handle/10665/246191>  
29  
30  
31 504 5. Mallewa M, Vallely P, Faragher B, *et al.* Viral CNS infections in children from a  
32  
33 505 malaria-endemic area of Malawi: a prospective cohort study. *Lancet Glob Health*. 2013;1:e153-  
34  
35 506 160.  
36  
37 507 6. Beare NAV, Taylor TE, Harding SP, *et al.* Malarial retinopathy: a newly established  
38  
39 508 diagnostic sign in severe malaria. *Am J Trop Med Hyg* 2006;75:790–7.  
40  
41  
42 509 7. Dondorp AM, Fanello CI, Hendriksen ICE, *et al.* Artesunate versus quinine in the  
43  
44 510 treatment of severe falciparum malaria in African children (AQUAMAT): an open-label,  
45  
46 511 randomised trial. *Lancet Lancet* 2010;376:1647–57.  
47  
48  
49 512 8. World Health Organization. La prise en charge du paludisme grave - guide pratique.  
50  
51 513 Troisième édition. Available at:  
52  
53 514 <http://www.who.int/malaria/publications/atoz/9789241548526/fr/>  
54  
55  
56 515 9. Severe malaria. *Trop Med Int Health TM IH*. 2014;19 Suppl 1:7–131.  
57  
58 516 10. Christensen SS, Eslick GD. Cerebral malaria as a risk factor for the development of  
59  
60

- 1  
2  
3 517 epilepsy and other long-term neurological conditions: a meta-analysis. *Trans R Soc Trop Med*  
4  
5 518 *Hyg*;109:233–8.  
6  
7  
8 519 11. Wernsdorfer WH. The development and spread of drug-resistant malaria. *Parasitol*  
9  
10 520 *Today* 1991;7:297–303.  
11  
12 521 12. Mengesha T, Makonnen E. Comparative efficacy and safety of chloroquine and  
13  
14 522 alternative antimalarial drugs: a meta-analysis from six African countries. *East Afr Med J*  
15  
16 523 1999;76:314–9.  
17  
18  
19 524 13. World Health Organization. WHO calls for an immediate halt to provision of single-  
20  
21 525 drug artemisinin malaria pills. Available at:  
22  
23 526 <http://www.who.int/mediacentre/news/releases/2006/pr02/en/>  
24  
25  
26 527 14. Noedl H, Se Y, Schaecher K, *et al.* Evidence of artemisinin-resistant malaria in western  
27  
28 528 Cambodia. *N Engl J Med* 2008;359:2619–20.  
29  
30  
31 529 15. Dondorp AM, Nosten F, Yi P, *et al.* Artemisinin resistance in *Plasmodium falciparum*  
32  
33 530 malaria. *N Engl J Med* 2009;361:455–67.  
34  
35  
36 531 16. World Health Organization. Status report on artemisinin resistance and ACT efficacy.  
37  
38 532 Available at: [http://www.who.int/malaria/publications/atoz/artemisinin-resistance-](http://www.who.int/malaria/publications/atoz/artemisinin-resistance-august2018/en/)  
39  
40 533 [august2018/en/](http://www.who.int/malaria/publications/atoz/artemisinin-resistance-august2018/en/)  
41  
42  
43 534 17. World Health Organization. Global report on insecticide resistance in malaria vectors:  
44  
45 535 2010-2016. Available at: <http://www.who.int/malaria/publications/atoz/9789241514057/en/>  
46  
47 536 18. Kraemer SM, Smith JD. A family affair: var genes, PfEMP1 binding, and malaria  
48  
49 537 disease. *Curr Opin Microbiol* 2006;9:374–80.  
50  
51  
52 538 19. Tuikue Ndam NG, Salanti A, Bertin G, *et al.* High level of var2csa transcription by  
53  
54 539 *Plasmodium falciparum* isolated from the placenta. *J Infect Dis* 2005;192:331–5.  
55  
56  
57 540 20. Moussiliou A, Alao MJ, Denoed-Ndam L, *et al.* High plasma levels of soluble  
58  
59 541 endothelial protein C receptor are associated with increased mortality among children with  
60

- 1  
2  
3 542 cerebral malaria in Benin. *J Infect Dis* 2015;211:1484–8.  
4  
5 543 21. Miller LH, Baruch DI, Marsh K, *et al.* The pathogenic basis of malaria. *Nature*  
6  
7 544 2002;415:673–9.  
8  
9 545 22. Tuikue Ndam N, Deloron P. Towards a vaccine against pregnancy-associated malaria.  
10  
11 546 *Parasite* 2008;15:515–21.  
12  
13 547 23. Bertin GI, Sabbagh A, Argy N, *et al.* Proteomic analysis of *Plasmodium falciparum*  
14  
15 548 parasites from patients with cerebral and UM. *Sci Rep.* 2016;6:26773.  
16  
17 549 24. White NJ, Turner GDH, Day NPJ, *et al.* Lethal malaria: Marchiafava and Bignami were  
18  
19 550 right. *J Infect Dis* 2013;208:192–8.  
20  
21 551 25. Berendt AR, Tumer GD, Newbold CI. CM: the sequestration hypothesis. *Parasitol*  
22  
23 552 *Today* 1994;10:412–4.  
24  
25 553 26. Clark IA, Cowden WB, Rockett KA. The pathogenesis of human cerebral malaria.  
26  
27 554 *Parasitol Today* 1994;10:417–8.  
28  
29 555 27. Beare NAV, Harding SP, Taylor TE, *et al.* Perfusion abnormalities in children with  
30  
31 556 cerebral malaria and malarial retinopathy. *J Infect Dis* 2009;199:263–71.  
32  
33 557 28. Dorovini-Zis K, Schmidt K, Huynh H, *et al.* The neuropathology of fatal cerebral  
34  
35 558 malaria in malawian children. *Am J Pathol* 2011;178:2146–58.  
36  
37 559 29. McDonough A, Weinstein JR. Neuroimmune Response in Ischemic Preconditioning.  
38  
39 560 *Neurother J Am Soc Exp Neurother* 2016;13:748–61.  
40  
41 561 30. Kim E, Cho S. Microglia and Monocyte-Derived Macrophages in Stroke. *Neurother J*  
42  
43 562 *Am Soc Exp Neurother* 2016;13:702–18.  
44  
45 563 31. Xia C-Y, Zhang S, Gao Y, *et al.* Selective modulation of microglia polarization to M2  
46  
47 564 phenotype for stroke treatment. *Int Immunopharmacol* 2015 Apr;25:377–82.  
48  
49 565 32. Kumar A, Barrett JP, Alvarez-Croda D-M, *et al.* NOX2 drives M1-like  
50  
51 566 microglial/macrophage activation and neurodegeneration following experimental traumatic  
52  
53  
54  
55  
56  
57  
58  
59  
60

- 1  
2  
3 567 brain injury. *Brain Behav Immun* 2016;58:291–309.
- 4  
5 568 33. Pino P, Taoufiq Z, Nitchou J, *et al.* Blood-brain barrier breakdown during cerebral  
6  
7 569 malaria: suicide or murder? *Thromb Haemost* 2005;94:336–40.
- 8  
9  
10 570 34. Postma NS, Mommers EC, Eling WM, *et al.* Oxidative stress in malaria; implications  
11  
12 571 for prevention and therapy. *Pharm World Sci PWS* 1996;18:121–9.
- 13  
14 572 35. Eisenhut M. The evidence for a role of vasospasm in the pathogenesis of cerebral  
15  
16 573 malaria. *Malar J*;14:405.
- 17  
18 574 36. Eisenhut M. Vasospasm in cerebral inflammation. *Int J Inflamm* 2014;2014:509707.
- 19  
20 575 37. O'Brien NF, Mutatshi Taty T, Moore-Clingenpeel M, *et al.* Transcranial Doppler  
21  
22 576 Ultrasonography Provides Insights into Neurovascular Changes in Children with cerebral  
23  
24 577 malaria. *J Pediatr* 2018;203:116-124.e3.
- 25  
26  
27 578 38. Bertin GI, Lavstsen T, Guillonneau F, *et al.* Expression of the domain cassette 8  
28  
29 579 *Plasmodium falciparum* erythrocyte membrane protein 1 is associated with cerebral malaria in  
30  
31 580 Benin. *PloS One* 2013;8:e68368.
- 32  
33  
34 581 39. Ponts N, Chung D-WD, Le Roch KG. Strand-specific RNA-seq applied to malaria  
35  
36 582 samples. *Methods Mol Biol Clifton NJ* 2012;883:59–73.
- 37  
38 583 40. Bertin GI, Sabbagh A, Guillonneau F, *et al.* Differential protein expression profiles  
39  
40 584 between *Plasmodium falciparum* parasites isolated from subjects presenting with pregnancy-  
41  
42 585 associated malaria and uncomplicated malaria in Benin. *J Infect Dis* 2013;208:1987–97.
- 43  
44  
45 586 41. Otto TD, Wilinski D, Assefa S, *et al.* New insights into the blood-stage transcriptome  
46  
47 587 of *Plasmodium falciparum* using RNA-Seq. *Mol Microbiol* 2010;76:12–24.
- 48  
49  
50 588 42. Varet H, Brillet-Guéguen L, Coppée J-Y, *et al.* A DESeq2- and EdgeR-Based R Pipeline  
51  
52 589 for Comprehensive Differential Analysis of RNA-Seq Data. *PloS One* 2016;11:e0157022.
- 53  
54  
55 590 43. van Buuren S, Boshuizen HC, Knook DL. Multiple imputation of missing blood  
56  
57 591 pressure covariates in survival analysis. *Stat Med* 1999;18:681–94.
- 58  
59  
60



1  
2  
3 592 44. Idro R, Kakooza-Mwesige A, Asea B, *et al.* Cerebral malaria is associated with long-  
4  
5 593 term mental health disorders: a cross sectional survey of a long-term cohort. *Malar J*  
6  
7 594 2016;15:184.  
8  
9

10 595  
11  
12  
13  
14  
15  
16  
17  
18  
19  
20  
21  
22  
23  
24  
25  
26  
27  
28  
29  
30  
31  
32  
33  
34  
35  
36  
37  
38  
39  
40  
41  
42  
43  
44  
45  
46  
47  
48  
49  
50  
51  
52  
53  
54  
55  
56  
57  
58  
59  
60

For peer review only

| Clinical manifestations                                   | Prognosis value | Frequency in children |
|-----------------------------------------------------------|-----------------|-----------------------|
| Impaired consciousness                                    | +++             | +++                   |
| Respiratory distress                                      | +++             | +++                   |
| Multiple convulsions                                      | +               | +++                   |
| Prostration                                               | +               | +++                   |
| Shock                                                     | +++             | +                     |
| Pulmonary oedema (radiology)                              | +++             | +/-                   |
| Abnormal bleeding                                         | +++             | +/-                   |
| Jaundice                                                  | ++              | +                     |
| Laboratory indices                                        | Prognosis value | Frequency             |
| Severe anemia (hemoglobin < 5g/dL<br>or hematocrit < 15%) | +               | +++                   |
| Hypoglycaemia (< 40 mg/dL)                                | +++             | +++                   |
| Acidosis (bicarbonate < 15 mM)                            | +++             | +++                   |
| Hyperlactemia (lactates > 5 mM)                           | +++             | +++                   |
| Renal impairment (creatinin > 3<br>mg/dL)                 | ++              | +                     |
| Hyperparasitemia (parasitaemia ><br>10%)                  | +/-             | ++                    |

596 Table 1 – Clinical and laboratory criteria for severe malaria (from (4))

597

598

|                                 | Score      |
|---------------------------------|------------|
| <b>Best motor response</b>      |            |
| Localises painful stimulus      | 2          |
| Withdraws limb from pain        | 1          |
| Non-specific or absent response | 0          |
| <b>Verbal response</b>          |            |
| Appropriate cry                 | 2          |
| Moan or inappropriate cry       | 1          |
| None                            | 0          |
| <b>Eye movement</b>             |            |
| Directed                        | 1          |
| Not directed                    | 0          |
| <b>Total</b>                    | <b>0-5</b> |

599 Table 2 – Blantyre score (from (4))

600

| Task                                                                  | Calendar |      |    |    |    |      |    |    |    |      |    |    |
|-----------------------------------------------------------------------|----------|------|----|----|----|------|----|----|----|------|----|----|
|                                                                       | 2017     | 2018 |    |    |    | 2019 |    |    |    | 2020 |    |    |
|                                                                       | T4       | T1   | T2 | T3 | T4 | T1   | T2 | T3 | T4 | T1   | T2 | T3 |
| <b>Cohort recruitment and follow-up</b>                               |          |      |    |    |    |      |    |    |    |      |    |    |
| Area preparation                                                      | ■        | ■    |    |    |    |      |    |    |    |      |    |    |
| Inclusion                                                             |          | ■    | ■  | ■  | ■  | ■    | ■  | ■  | ■  |      |    |    |
| Follow-up                                                             |          |      |    |    |    |      |    |    |    |      |    |    |
| Biological samples organization                                       |          | ■    | ■  | ■  | ■  | ■    | ■  | ■  | ■  |      |    |    |
| <b>Parasite factors</b>                                               |          |      |    |    |    |      |    |    |    |      |    |    |
| Parasite whole genome sequencing                                      |          |      |    |    | ■  | ■    | ■  | ■  | ■  |      |    |    |
| Parasite RNA-Sequencing                                               |          |      |    |    | ■  | ■    | ■  | ■  | ■  |      |    |    |
| Mass spectrometry analysis                                            |          |      |    |    |    |      |    | ■  | ■  | ■    | ■  |    |
| Identified protein validation                                         |          |      |    |    |    |      |    |    |    | ■    | ■  | ■  |
| Protein's role on endothelium activation                              | ■        | ■    | ■  | ■  | ■  | ■    |    |    |    | ■    | ■  | ■  |
| <b>Host factors</b>                                                   |          |      |    |    |    |      |    |    |    |      |    |    |
| Macrophage M2 kinetics apparition in mice brain                       | ■        | ■    | ■  | ■  | ■  | ■    |    |    |    |      |    |    |
| Endogenous mediator role in neuroinflammation                         |          |      |    |    | ■  | ■    | ■  | ■  | ■  |      |    |    |
| Neuroinflammation markers identification in cerebral malaria patients |          |      |    |    |    |      |    |    |    | ■    | ■  | ■  |
| <b>Results exploitation</b>                                           |          |      |    |    |    |      |    |    |    |      |    |    |
| Database validation                                                   | ■        | ■    | ■  | ■  | ■  | ■    | ■  | ■  | ■  | ■    | ■  | ■  |
| Data analysis                                                         |          |      |    |    |    |      |    | ■  | ■  |      |    | ■  |
| Dissemination                                                         |          |      |    |    |    |      |    |    |    |      |    | ■  |

601 Table 3 - Detailed research planning
